# Flexible multivariate linear mixed models for structured multiple traits

1 Hyeonju Kim<sup>1</sup>, Gregory Farage<sup>1</sup>, John T. Lovell<sup>2</sup>, John K. Mckay<sup>3</sup>, Thomas E. Juenger<sup>4</sup>, & Śaunak

2 Sen<sup>1</sup>

3 <sup>1</sup>*Division of Biostatistics, Department of Preventive Medicine, University of Tennessee Health*

4 *Science Center, Memphis, Tennessee, USA.*

5 <sup>2</sup>*Genome Sequencing Center, HudsonAlpha Institute for Biotechnology, Huntsville, Alabama,*

6 *USA.*

7 <sup>3</sup>*Department of Bioagricultural Sciences and Graduate Degree Program in Ecology, Colorado State*

8 *University, Fort Collins, Colorado, USA.*

9 <sup>4</sup>*Department of Integrative Biology, University of Texas, Austin, Texas, USA.*

10 **Many genetic studies collect structured multivariate traits containing rich information across**  
11 **traits. We present a flexible multivariate linear mixed model for quantitative trait loci map-**  
12 **ping (FlxQTL) for multiple correlated traits that adjusts for genetic relatedness and that**  
13 **models information on multiple environments or multiple timepoints using trait covariates.**  
14 **FlxQTL handles genetic mapping of multivariate traits faster with greater flexibility com-**  
15 **pared to previous implementations.**

16 Multivariate traits are increasingly common in genetic studies. A trait may be measured in  
17 multiple environments, at multiple timepoints (e.g. repeated measures), or under different treat-  
18 ments. Such a trait can be considered as a multivariate trait with spatial, temporal <sup>1,2</sup> or more com-

19 plex structures. For instance, body weight might be measured weekly, plant crop yield or biomass  
20 could be measured in multiple geographic locations for years, (in multi-environment trials, MET),  
21 and gene expression may be measured in different brain regions of the same rat. In humans it is  
22 common to study genotype-phenotype associations in population-based samples for genome-wide  
23 association studies (GWAS); in model organisms complex breeding designs are often used. Linear  
24 mixed models (LMMs) <sup>3-6</sup> are employed for controlling confounding due to genetic relatedness  
25 among individuals and are used to identify genetic loci contributing to quantitative traits of inter-  
26 est (QTL) <sup>7-13</sup>. Multivariate LMMs (MLMMs) further enhance statistical power over univariate  
27 LMMs <sup>14</sup> because they can accumulate signals across traits <sup>8,15</sup> with a common genetic locus.

28 While recognized as advantageous, fitting MLMMs is generally avoided because it is com-  
29 putationally challenging. Parameter estimation involves multidimensional optimization, there is  
30 a risk of reaching suboptimal solutions, and it is computationally expensive <sup>9,14</sup>. Existing algo-  
31 rithms (GCTA <sup>16,17</sup>, ASReml <sup>18</sup>, WOMBAT <sup>19</sup>, GEMMA <sup>14</sup>) use the expectation-maximization  
32 (EM) method followed by second order schemes such as Newton-Rapson (NR), Average Informa-  
33 tion (AI), etc. to provide stable, fast convergence <sup>5,14</sup>. The computational complexity is  $O(n^3m^3)$   
34 for EM and  $O(n^3m^7)$  for NR, AI ( $m$  traits,  $n$  individuals). This suggests that using GCTA, WOM-  
35 BAT, and ASReml is not practical for GWAS with a large number of SNPs and a moderate number  
36 of individuals <sup>14</sup>. GCTA can fit only up to 2 traits; ASReml and WOMBAT offer some flexibility  
37 in choosing some covariance structures and including modeling fixed effects of covariates. All  
38 have limitations in the number of traits they can handle and are much slower than GEMMA. None  
39 of these methods offer the ability to model spatial or temporal structure in the trait using trait

40 covariates.

41 Here, we introduce FlxQTL, which can test associations between genetic markers and mul-  
42 tiple correlated traits (**Supplementary Software** and <https://github.com/senresearch/FlxQTL.jl> ).  
43 Our method is a MLM that models the mean using a bilinear model of individual and trait co-  
44 variates (**Fig. 1**). The error term is the sum of a genetic random effect and a pure error component.  
45 The pure error term is correlated across traits but is independent across individuals. The genetic  
46 variance component is assumed to be proportional to the Kronecker product of a genetic kinship  
47 matrix and a trait kernel. In the case of MET, that can be interpreted as a random effect term  
48 comprised of the sum of many small random GxE effects (**Supplementary Note**). We assume

$$Y = XBZ' + R + E, \quad (1)$$

49 where  $Y_{n \times m}$  is the response matrix for a trait measured in  $n$  individuals across  $m$  environments (or  
50 over  $m$  time points) or phenotypes of  $n$  individuals for  $m$  traits,  $X_{n \times p}$  is a matrix of  $p$  genotype  
51 probabilities (or genotypes including the intercept) of a marker to be tested, and  $Z_{m \times q}$  is a matrix  
52 of  $q$  trait covariates such as environment contrasts in MET, spline basis functions for modeling  
53 smooth temporal traits.  $B$  is a coefficient matrix to be estimated,  $R$  is the matrix of genetic random  
54 effects, and  $E$  is the residual error matrix. The likelihood ratio test (LRT) to test the association  
55 between a marker and a multivariate trait of interest is expressed as a LOD score ( $-\log_{10}(LRT)$ ).  
56 Genomewide thresholds for significance may be obtained from the null distribution of maximum  
57 LOD scores using a permutation scheme (Online Methods).

58 FlxQTL simplifies parameter estimation using its model structure (**Fig. 1**) and the choice of

59 numerical methods. The trait covariates reduce the fixed effects matrix dimension from  $p \times m$  for  
60 existing MLMs<sup>8,14</sup>, to  $p \times q$ , which is substantial when  $m/q$  is large. The trait kernel reduces  
61 a  $m \times m$  random effects covariance matrix to a scalar parameter. With an unstructured pure error  
62 matrix, only  $pq + 1 + \frac{m(m+1)}{2}$  parameters are estimated, instead of  $pm + m(m+1)$  ( $q \ll m$ ) for other  
63 MLMs. FlxQTL has been tested with up to a 36-dimensional quantitative trait. Unlike NR and  
64 AI, a Speed restarting Nesterov's accelerated gradient method requires no second derivative and  
65 provides stable linear convergence<sup>20</sup>. We use an expectation-conditional maximization (ECM)<sup>21</sup>  
66 step, followed by the acceleration step using a tuned momentum coefficient, which behaves like  
67 the second derivative, to update parameters (**Supplementary Note**). These simplifications offer  
68 improved complexity compared to existing algorithms (Online Methods).

69 FlxQTL offers flexibility in handling varied trait structures and can analyze complex crosses  
70 if genotype probability data is available. The user can choose contrasts between trait covariates  
71 to influence how structured traits are analyzed. For example, GxE interactions can be analyzed  
72 using a contrast between sites in the  $Z$  matrix. One can use B-spline, wavelet, or Fourier basis  
73 functions in the  $Z$  matrix to model an environmental gradient or a time trend. By judiciously  
74 choosing the  $Z$  (trait covariate design) matrix, the user can model high-dimensional structured  
75 traits in MET, multiple related traits, and time-valued traits for a variety of model organisms as  
76 well as humans. Unlike some programs designed only for human genetics (maximum of three  
77 genotype states possible at a locus), if genotype probabilities are available, they can be used for  
78 QTL analysis in FlxQTL. This opens up the possibility of using 4-way crosses and multi-parental  
79 crosses such as heterogeneous stocks and the Collaborative Cross.

80 We compared the performance of FlxQTL with that of GEMMA on the Mouse HS1940  
81 data distributed with GEMMA. The trait kernel and trait covariate matrices were set to be identity  
82 matrices in FlxQTL since they are not supported by GEMMA. We measured computation times  
83 for analyzing 3 traits and then increased the number of traits and the number of SNPs analyzed  
84 for both algorithms (Data processing and analysis in Online Methods). The difference in P values  
85 between the algorithms was negligible (**Fig. 2b** and **2c**). GEMMA was faster for a smaller number  
86 of traits (3 traits), whereas FlxQTL was 1.5-21 times faster than GEMMA when more traits were  
87 analyzed (6-12 traits) (**Fig. 2a**). These results show that FlxQTL offers fast implementation for  
88 high-dimensional traits.

89 We evaluated the statistical performance of FlxQTL simulating 6-dimensional quantitative  
90 trait datasets using genotypes from *Arabidopsis thaliana*<sup>22</sup> studied in two sites for three years (On-  
91 line Methods). We carried out two simulation studies on the contributions of a climatic relatedness  
92 matrix as a trait kernel and trait covariates, respectively. A comparison of power with, and with-  
93 out the climatic relatedness was made when including the same trait contrasts (**Supplementary**  
94 **Figs. 3-5**). We next compared power with and without trait covariates, allowing main effect QTL  
95 and QTL×site interactions, keeping those climatic relatedness matrices the same (**Supplementary**  
96 **Fig. 6**). The thresholds for the type I error rate were calibrated by the distribution of maximum  
97 LOD scores under the null model of only multivariate gene and environment random effects. The  
98 power was measured under the alternative model of existing large effects of QTL based on the  
99 thresholds. The overall result of assessing the trait kernel showed that including climatic related-  
100 ness as a trait kernel yielded only subtle differences in power. The result from the added value of

101 trait covariates varying the strength of the genetic variance component demonstrated that in each  
102 case, the power was the highest when including trait covariates (**Supplementary Fig. 6**).

103 We applied FlxQTL on the data of recombinant inbred lines from *A. thaliana* by crossing  
104 populations, where the trait was the mean number of fruits per seedling planted in two distinct re-  
105 gions, Sweden and Italy, from July, 2009 to June, 2012. Due to the lack of formal statistical frame-  
106 works for QTL analysis in such reciprocal transplant experiments, Ågren et al.<sup>22</sup> performed six  
107 separate univariate QTL scans and dissected the effects post hoc. FlxQTL can directly test for the  
108 presence of genetic drivers of adaptation in replicated reciprocal transplants (the data processing  
109 and analysis is detailed in Online Methods, **Supplementary Tables 1 and 2** and **Supplementary**  
110 **Figs. 11-15**).

111 FlxQTL was applied to a more complex dataset, a four-way outbred mapping population in  
112 outcrossing switchgrass (*Panicum virgatum*). The trait was flowering time measured across 10  
113 sites spanning a latitudinal gradient for 4 years (2016-2019). We considered it as a 36-dimensional  
114 multivariate trait since 4 site-year combination had missing data. These traits are highly correlated  
115 due to shared genetic and environmental contributions. We scanned for loci showing multivari-  
116 ate effects and picked the top three QTL. For those QTL, we performed an environment scan, for  
117 monthly averaged photoperiod in different sites and years. We found that the photoperiod influ-  
118 ences one locus (QTL@6.6012 on Chromosome 5N) much more compared to the two other QTL  
119 (**Supplementary Fig. 16** and Data processing and analysis in Online Methods). This suggests one  
120 locus is more responsive to photoperiod and has implications for breeding.

121 As an example of a longitudinal trait, we analyzed body weight measured weekly from birth  
122 to 16 weeks in 1212  $F_2$  intercrosses between Gough Island mice and WSB/EiJ<sup>2</sup>. We used cubic  
123 splines with 4 degrees of freedom as the trait covariates. FlxQTL captured the weight trend and  
124 corresponding weight growth rate simultaneously and yielded the result similar to R/qtl<sup>23</sup>. For two  
125 chromosomes, we performed two-dimensional genome scan for further investigation and found  
126 several more QTL. (Online Methods and **Supplementary Figs. 17- 21**).

127 Our results demonstrate that the model and estimation algorithm are effective in analyz-  
128 ing higher dimensional structured traits with fast parameter estimation. On the simulation study,  
129 FlxQTL increases power making use of information from trait covariates. Our method appears to  
130 be insensitive to a choice of trait kernel matrices in our studies so far, and this may be worth further  
131 investigation.

132 The underlying trait model assumes a joint multivariate normal distribution and is not ideal  
133 for traits such as count data with lots of zeros, which do not fit this scenario. Some traits may  
134 need transformation to better fit the multivariate normal assumption. Our method assumes that  
135 the multivariate trait has no missing data and that genotypes are either completely observed or  
136 imputed, or genotype probabilities are used. If phenotype data contain missing values, one can use  
137 imputation<sup>24</sup>. With the growth of more complex and high-throughput phenotyping, we expect the  
138 use of our models to help shed light on the genetic control of structured multivariate traits.

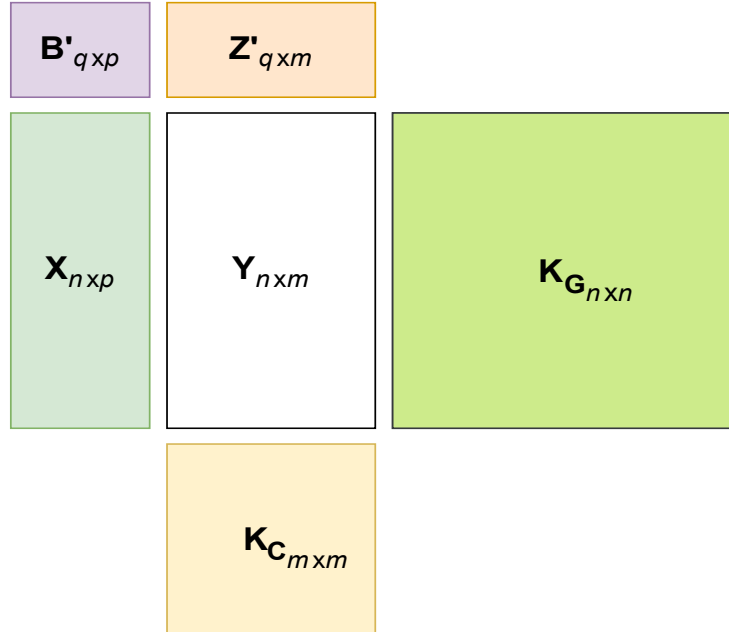

Figure 1: FlxQTL model components and their dimensions. The trait matrix ( $Y_{n \times m}$ ) has information for  $n$  individuals (row) and  $m$  traits (column). In each dimension (by row and column), we have two paired components corresponding to fixed and random term respectively. The two components by row are a matrix of  $p$  genotypes of a marker ( $X_{n \times p}$ ) to be tested and a kinship matrix ( $K_G$ ). The two components by column are a matrix of  $q$  trait covariates  $Z_{m \times q}$ , and a trait kernel  $K_C$ .  $B_{p \times q}$  is a matrix of fixed effects to be estimated. The two kernel matrices,  $K_G$  and  $K_C$  contribute to the variance component, and the two design matrices,  $X$  and  $Z$ , contribute to the mean components.



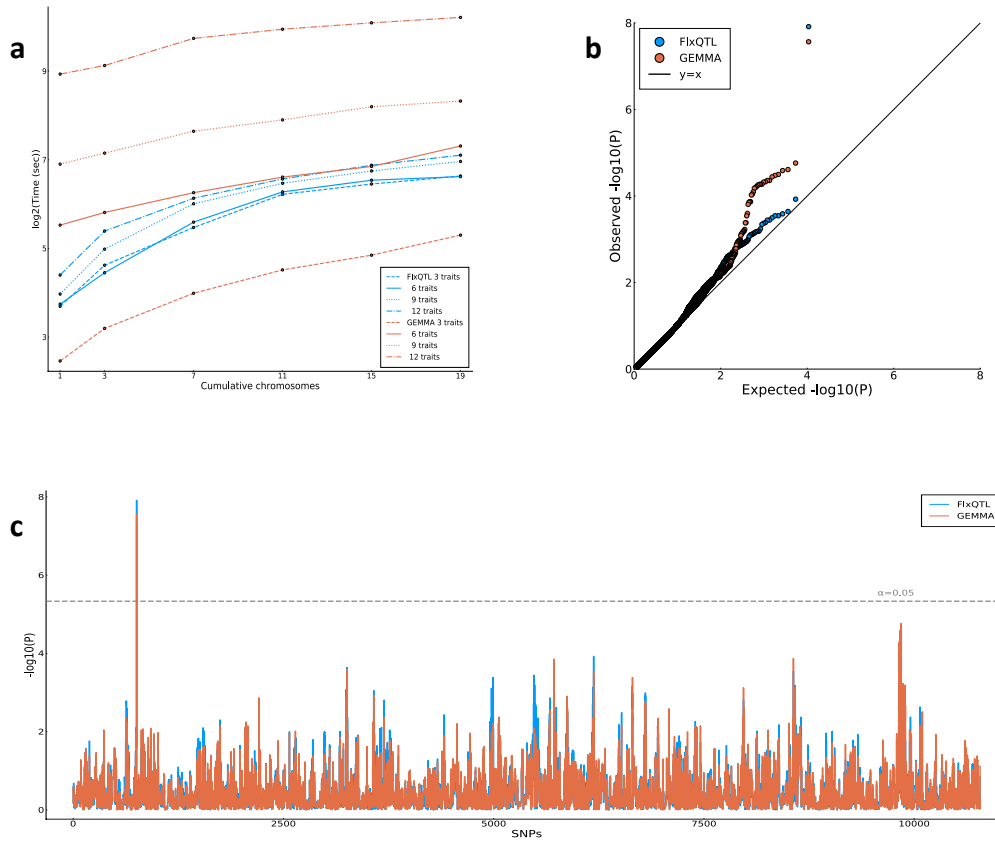

Figure 2: Comparison of FlxQTL and GEMMA using Mouse HS1940 data (n=1940 individuals, p=10783 SNPs) and simulated data. **(a)** Computation times in seconds on logarithmic scale (base 2) for parameter estimation as a function of the number of traits and SNPs. **(b,c)** Comparison of P values from the two algorithms using a quantile-quantile plot **(b)** and a genome scan plot **(c)** for 3 traits. The horizontal line is a Bonferroni adjusted threshold at the significance level of  $\alpha = 0.05$ . Computing platforms: Linux Debian 4.19.37-5 (OS), Intel(R) Xeon(R) CPU E5-2630 2.4GHz (CPU), FlxQTL (Julia v.1.5.3 with 32 cores), GEMMA (v.0.98.3 with maximum 32 threads)

## 139 METHODS

140 Methods and any associated references are available in the Online Methods.

## 141 ONLINE METHODS

142 **Code availability.** A Julia software implementation of FlxQTL is available at

143 <https://github.com/senresearch/FlxQTL.jl>.

144 **FlxQTL model.** Let  $Y_{n \times m}$  be a trait measured in  $n$  individuals across  $m$  environments (or over  $m$   
145 time points), or phenotypes of  $n$  individuals for  $m$  correlated traits.  $X_{n \times p}$  is a matrix of  $p$  genotypes  
146 including the intercept (or genotype probabilities) of a marker to be tested and can also optionally  
147 include individual level covariates such as sex for animals or cytoplasm origin for plants.  $Z_{m \times q}$  is  
148 a matrix of  $q$  trait covariates such as (site) contrasts, (orthonormal) basis functions, etc. Our model  
149 for the trait is:

$$Y = XBZ' + R + E. \quad (2)$$

150 The two independent random effects follow matrix variate normal distributions:

$$R \sim MVN(0, \tau^2 K_C, K_G), \quad E \sim MVN(0, \Sigma, I_n). \quad (3)$$

151 One can easily see that compared to standard multivariate regression, where  $Z = I_m$ ,  $q = m$ , our  
152 model reduces the size of  $B$  from  $p \times m$  to  $p \times q$ . This dimension reduction is consequential when  
153  $q \ll m$ , as is often the case when working with higher dimensional trait data.

154 In the first variance component,  $K_G$  is a genetic relatedness (kinship) matrix between in-

155 individuals computed by background genetic markers, and  $K_C$  is a trait kernel generated by extra  
156 information associated with the traits; in MET, the trait kernel can be a relatedness matrix derived  
157 from high-dimensional environment (or site) information such as daily minimum, or maximum  
158 temperature, precipitation, etc. We show that for MET, the variance component,  $R^v$ , composed of  
159 many infinitesimal  $G \times E$  effects, has variance proportional to  $K_C \otimes K_G$  (**Supplementary Note**).  
160  $\tau^2$  is a scalar parameter for reducing the dimension of a covariance matrix, which is unknown in  
161 other studies, by assuming it is proportional to  $K_C$ . If no information is available on the multiple  
162 traits, then  $K_C = I$  is advisable.

163 The second variance component assumes correlations among traits but independent and iden-  
164 tically distributed (iid) noise between individuals. The common error covariance matrix is  $\Sigma$  which  
165 assumes to be unstructured (no constraints). The two kernel matrices are precomputed from *a pri-*  
166 *ori* information, so that only  $\tau^2$  and  $\Sigma$  are estimated. The MLM in FlxQTL is then modeled (in  
167 vectorized form) by a multivariate normal distribution whose covariance matrix is the sum of two  
168 Kronecker products for the two independent random effects:

$$Y^v \sim N \left( (Z \otimes X) B^v, \tau^2 K_C \otimes K_G + \Sigma \otimes I_n \right), \quad (4)$$

169 where the superscript  $v$  denotes the vectorization of a matrix. LOD scores ( $-\log_{10}(LRT)$ ) are  
170 calculated by log-likelihood difference between the full model and null. We use permutations (at  
171 least 1000) to calculate empirical genomewide LOD thresholds as follows: 1. The traits are rotated  
172 by the eigenvectors of  $K_G$  (and  $K_C (\neq I)$ ). 2. The rotated traits are divided by the square root of  
173 their variance-covariance matrix to make them iid. 3. They are shuffled by row and transformed  
174 back by multiplying by the square root of the covariance matrix. 4. A genome scan is performed

175 on this shuffled trait, and the maximum LOD for each permutation is stored. Note that LOD scores  
176 using trait covariates ( $Z$ ) are lower than those implemented by conventional MLMs (i.e.  $Z = I$ ),  
177 but the genomewide significance threshold is also correspondingly lower.

178 *Computational costs.* The eigen decomposition of the kernel matrices is done only once; this has  
179 computational complexity  $O(n^3 + m^3) \approx O(n^3)$  ( $m \ll n$ ), the same as existing MLMs. A  
180 LOCO (Leave One Chromosome Out) scheme<sup>7,9,25</sup> has complexity  $O(dn^3) \approx O(n^3)$  ( $d \ll n$ ) for  
181  $d$  chromosomes and does not change complexity appreciably. In practice, genome scans with the  
182 LOCO scheme take longer depending on the data (about 30 % longer) than that without LOCO. For  
183  $t_0 \gg t$ , where  $t_0, t$  are the maximal number of iterations of ECM and ECM embedded in the Speed  
184 restarting Nesterov's scheme, respectively, the computational complexity of two step implementa-  
185 tion, which runs ECM for finding 'good' initial values followed by ECM embedded in the Speed  
186 restarting Nesterov's scheme, is  $O((c_1qn^2 + (m^3 + c_1m^2)n)(t_0 + t))$  per marker for  $n$  individuals,  $c_1$   
187 covariates. The whole computational complexity including the eigen decomposition and rotation  
188 by corresponding eigen vectors is now  $O(n^3 + (m + c_1)n^2 + s(c_1qn^2 + (m^3 + c_1m^2)n)(t_0 + t))$   
189 with  $s$  markers.

190 *Julia implementation.* FlxQTL is implemented in Julia<sup>26</sup>, a relatively new programming lan-  
191 guage, well-suited for developing and implementing algorithms for large datasets. Julia has a  
192 just-in-time (JIT) compiler, which allowed us to prototype algorithms with an ease comparable  
193 to scripted languages like R, and with a speed approaching compiled languages. Julia has native  
194 support for distributed and parallel computing, and users can take advantage of multiple cores or  
195 a high-performance computing (HPC) system to achieve a significant speedup. Genome scan with

196 millions of markers involving moderately high-dimensional traits is possible.

197 **Data processing and analysis.** *Mouse HSI940 data.* SNPs were filtered out by minor allele  
198 frequency (MAF) less than 2% since we found GEMMA automatically processed the data with  
199 that criterion. For a fair comparison, we used a centered genetic relatedness matrix computed by  
200 GEMMA, but it needed some adjustment by adding very small value ( $0.00001 * I$ ) to make sure the  
201 matrix should be positive definite. The trait data consisted of 3 traits with missing values and was  
202 imputed using R package, mice, with a ‘pmm’ option (predicted mean method). To compare the  
203 computation time between FlxQTL and GEMMA as a function of the number of traits and SNPs,  
204 we created new trait (triplets) by shuffling the trait data by individual preserving the correlation  
205 among three traits and added them to the existing traits. This produced 6, 9, and 12 simulated  
206 traits. We also generated 19 cumulative genotype datasets from the mouse data, that is, starting  
207 from a chromosome 1 SNP dataset (950 SNPs), building up a new dataset with 4-chromosome  
208 increments and reaching the whole SNP dataset (10783 SNPs). The median time for the genome  
209 scan without LOCO was obtained from 64 runs on each simulated trait data.

210 *Gough Island mouse data.* This is a  $F_2$  intercross between Gough Island mice and WSB/EiJ. We  
211 computed genotype probabilities, excluding sex chromosomes, from R/qlt adding pseudo markers  
212 in every 1cM between two markers. Traits were imputed using R-mice package with the ‘pmm’  
213 option and then were standardized by overall mean and standard deviation. We employed a 4  
214 degrees-of-freedom cubic spline from R-splines package to produce trait covariates ( $Z$ ) to capture  
215 the trend of weekly body weights and corresponding weight growth rate simultaneously. Here,  
216 we set the trait kernel to be an identity matrix. A genetic relatedness matrix was computed from

217 genotype probabilities using a linear kernel. The thresholds at  $\alpha = 0.1, 0.05$  were estimated from  
218 1000 permutations. The results from the one-dimensional multivariate genome scan by FlxQTL  
219 was largely consistent with that<sup>2</sup> from R/qtl using univariate linear regression, except for Chromo-  
220 some 6 and 7 perhaps due to polygenic effects. Since one QTL in Chromosome 7 was known to be  
221 crucial, we implemented a two-dimensional genome scan for Chromosome 7, as well as 8 and 10  
222 for comparison. FlxQTL detected several more QTL than R/qtl without requiring further analysis  
223 such as multiple-QTL analysis.

224 *Arabidopsis thaliana* data. We employed R/qtl to add pseudo markers in every 1cM between two  
225 markers and dropped one of two consecutive markers when they are identical. The trait data were  
226 imputed using the ‘pmm’ option in R-mice package and were standardized by column. A total of  
227 699 markers across 5 chromosomes were genotyped for 400 recombinant inbred lines, and a fit-  
228 ness trait was measured at two sites (Italy and Sweden) for three years (6-dimensional multivariate  
229 trait). The trait covariate matrix ( $Z$ ) set to be a matrix with an intercept column, and a contrast  
230 between sites (1’s for Sweden and -1’s for Italy). We computed both a genetic and a climatic re-  
231 latedness matrix using Manhattan distance. The climatic relatedness matrix was computed using  
232 daily range soil or air temperature, precipitation, etc. However, the difference between with and  
233 without climatic relatedness matrix appears to be small in our simulation studies (**Supplementary**  
234 **Fig. 7**). We performed 1-, 2-dimensional QTL analyses with the LOCO option followed by mul-  
235 tiple QTL analysis, i.e. a stepwise model selection approach by forward selection and backward  
236 elimination adding or dropping one or two QTL for each scan, respectively. The 95% cutoff was  
237 estimated by permutation test and was used for a penalty term in the stepwise model selection

238 since the false positive rate is maintained at the rate of  $\alpha$  in the case of no QTL and with the search  
239 restricted to models with no more than one QTL<sup>27</sup>. Our result revealed one more significant QTL  
240 in three chromosomes each but one less in two chromosomes each, by and large, agreeing with  
241 the existing result, with improved interpretation and without requiring secondary analysis of QTL  
242 across chromosomes<sup>22</sup>.

243 *Switchgrass (Panicum virgatum) data.* Genotype probabilities were computed in every 1cM be-  
244 tween two markers via R/qtl. Traits and climate information data had no missing values, so that  
245 the whole dataset comprises 6118 genetic markers by 750 individuals for 36 quantitative traits of  
246 flowering time as a combination of 10 latitudinal sites and 4 years from 2016 to 2019, as well as a  
247 matrix of 12 by 36-monthly photoperiod. Three significant QTL (two in Chromosome 5N and one  
248 in Chromosome 4K) were selected by 1D-genome scan with the LOCO option. For each QTL, an  
249 environment scan was performed by regressing each monthly photoperiod factor under the alter-  
250 native of existing an environmental factor that affects a QTL after the null scan. For computational  
251 efficiency, traits and monthly photoperiod data were centered by column means and scaled by  
252 overall standard deviations of the centered data.

253 **Simulation study.** We simulated data with the same overall structure and features of the Ara-  
254 bidopsis dataset<sup>22</sup>. A 6-dimensional multivariate trait was simulated with random GxE effects  
255 based on genotype data and daily soil minimum and maximum temperature data from those sites  
256 and years. Soil daily range temperatures (the difference between maximum and minimum temper-  
257 atures) were rearranged into a 3 year by 2 location combination, i.e. 365 days by 6 environments,  
258 and were standardized by overall mean and standard deviation. To generate null trait datasets, we

259 selected at random about 3.5% of the genetic markers (about 25 markers of total 699 markers) and  
260 8.2% of 365 soil daily range temperatures (about 30 days) and gave their interaction effect sizes  
261 drawn from a normal distribution with zero mean and variance  $\tau^2$  that varies from small to large  
262 **(Supplementary Note)**. An iid noise indicating random error was added to the null trait data; the  
263 covariance matrix of the error term was varied. Both random and error terms were respectively  
264 standardized. To generate a fixed effect QTL to the null data, we sampled one genetic marker  
265 not selected among the random effects above and multiplied it by fixed effect sizes varying from  
266 small to large and the orthonormal site contrast matrix ( $Z$ ). For simplicity, we only considered one  
267 fixed effect QTL. We carried out 1000 simulations under the null to attain a threshold at  $\alpha = 0.05$   
268 from the distribution of maximum LOD scores and measured power under the alternative for each  
269 instance given the trait kernel. The first simulation study to assess power for the effect of climatic  
270 relatedness varied with values of  $\tau^2$  for each fixed effect size matrix ( $B$ ), which in total resulted  
271 in 100,000 experiments. We then narrowed down to the feasible range of fixed effect sizes by  
272 excluding the effect sizes producing zeros and ones of power. Within that range, simulations were  
273 performed to establish a comparison between inclusion and exclusion of the climatic relatedness  
274 matrix ( $K_C$ ) changing  $\tau^2$ . Since corresponding results showed slight distinctions in power, we  
275 tackled unusual scenarios in genome scan, where  $K_C$ 's are an autocorrelated matrix, an extreme  
276 case of positive definite matrix, etc. The results revealed analogous power to those shown in prior  
277 experiments. The second simulation study to assess the effect of trait covariates ( $Z$ ) was imple-  
278 mented in the similar manner. In the given range of fixed effect sizes, we compared three cases:  
279 non-identity contrasts (site contrasts in FlxQTL), an identity contrast ( $Z = I$  in FlxQTL), Julia ver-



280 sion MLMM. Note that the Julia version of MLMM was developed as an alternative of GEMMA  
281 for ease of comparison with our method.

- 282 1. Xiong, H. *et al.* A flexible estimating equations approach for mapping function-valued traits.  
284 *Genetics* **189**, 305–316 (2011).
- 285 2. Gray, M. M. *et al.* Genetics of rapid and extreme size evolution in island mice. *Genetics* **201**,  
286 213–228 (2015).
- 287 3. Garin, V., Malosetti, M. & van Eeuwijk, F. Multi-parent multi-environment QTL analysis:  
288 an illustration with the EU-NAM Flint population. *TAG. Theoretical and Applied genetics*.  
289 *Theoretische und Angewandte Genetik* (2020).
- 290 4. Smith, A., Cullis, B. & Thompson, R. Analyzing variety by environment data using mul-  
291 tiplicative mixed models and adjustments for spatial field trend. *Biometrics* **57**, 1138–1147  
292 (2001).
- 293 5. Smith, A. B., Cullis, B. R. & Thompson, R. The analysis of crop cultivar breeding and  
294 evaluation trials: an overview of current mixed model approaches. *The Journal of Agricultural*  
295 *Science* **143**, 449–462 (2005).
- 296 6. Cullis, B. R., Smith, A. B., Beeck, C. P. & Cowling, W. A. Analysis of yield and oil from  
297 a series of canola breeding trials. Part II. Exploring variety by environment interaction using  
298 factor analysis. *Genome* **53**, 1002–1016 (2010).

- 299 7. Lippert, C. *et al.* FaST linear mixed models for genome-wide association studies. *Nature*  
300 *methods* **8**, 833 (2011).
- 301 8. Casale, F. P., Rakitsch, B., Lippert, C. & Stegle, O. Efficient set tests for the genetic analysis  
302 of correlated traits. *Nature methods* **12**, 755–758 (2015).
- 303 9. Loh, P.-R. *et al.* Efficient Bayesian mixed-model analysis increases association power in large  
304 cohorts. *Nature genetics* **47**, 284 (2015).
- 305 10. Price, A. L., Zaitlen, N. A., Reich, D. & Patterson, N. New approaches to population stratifi-  
306 cation in genome-wide association studies. *Nature Reviews Genetics* **11**, 459–463 (2010).
- 307 11. Kang, H. M. *et al.* Variance component model to account for sample structure in genome-wide  
308 association studies. *Nature genetics* **42**, 348 (2010).
- 309 12. Yu, J. *et al.* A unified mixed-model method for association mapping that accounts for multiple  
310 levels of relatedness. *Nature genetics* **38**, 203–208 (2006).
- 311 13. Zhang, Z. *et al.* Mixed linear model approach adapted for genome-wide association studies.  
312 *Nature genetics* **42**, 355 (2010).
- 313 14. Zhou, X. & Stephens, M. Efficient multivariate linear mixed model algorithms for genome-  
314 wide association studies. *Nature methods* **11**, 407–409 (2014).
- 315 15. Korte, A. *et al.* A mixed-model approach for genome-wide association studies of correlated  
316 traits in structured populations. *Nature genetics* **44**, 1066 (2012).

- 317 16. Yang, J., Lee, S. H., Goddard, M. E. & Visscher, P. M. GCTA: a tool for genome-wide complex  
318 trait analysis. *The American Journal of Human Genetics* **88**, 76–82 (2011).
- 319 17. Lee, S. H., Yang, J., Goddard, M. E., Visscher, P. M. & Wray, N. R. Estimation of pleiotropy  
320 between complex diseases using single-nucleotide polymorphism-derived genomic relation-  
321 ships and restricted maximum likelihood. *Bioinformatics* **28**, 2540–2542 (2012).
- 322 18. Gilmour, A. R., Gogel, B. J., Cullis, B. R., Welham, S. J. & Thompson, R. ASReml user guide  
323 release 1.0 (2002).
- 324 19. Meyer, K. Wombat-A tool for mixed model analyses in quantitative genetics by restricted  
325 maximum likelihood (REML). *Journal of Zhejiang University Science B* **8**, 815–821 (2007).
- 326 20. Su, W., Boyd, S. & Candes, E. A differential equation for modeling Nesterov’s accelerated  
327 gradient method: Theory and Insights. In *Advances in Neural Information Processing Systems*,  
328 2510–2518 (2014).
- 329 21. Meng, X. L. & Rubin, D. B. Maximum likelihood estimation via the ECM algorithm: A  
330 general framework. *Biometrika* **80**, 267–278 (1993).
- 331 22. Ågren, J., Oakley, C. G., McKay, J. K., Lovell, J. T. & Schemske, D. W. Genetic mapping  
332 of adaptation reveals fitness tradeoffs in *Arabidopsis thaliana*. *Proceedings of the National  
333 Academy of Sciences* **110**, 21077–21082 (2013).
- 334 23. Broman, K. W. & Sen, S. *A Guide to QTL Mapping with R/qtl*, vol. 46 (Springer, 2009).

- 335 24. Buuren, S. v. & Groothuis-Oudshoorn, K. mice: Multivariate imputation by chained equations  
336 in R. *Journal of statistical software* 1–68 (2010).
- 337 25. Listgarten, J. *et al.* Improved linear mixed models for genome-wide association studies. *Nature*  
338 *methods* **9**, 525 (2012).
- 339 26. Bezanson, J., Edelman, A., Karpinski, S. & Shah, V. B. Julia: A fresh approach to numerical  
340 computing. *SIAM review* **59**, 65–98 (2017).
- 341 27. Manichaikul, A., Moon, J.-Y., Sen, S., Yandell, B. S. & Broman, K. W. A model selection  
342 approach for the identification of quantitative trait loci in experimental crosses, allowing epis-  
343 tasis. *Genetics* **181**, 1077–1086 (2009).
- 344 28. Henderson, C. R. Applications of linear models in animal breeding. *University of Guelph*  
345 *Press, Guelph* **11**, 652–653 (1984).
- 346 29. Ledoit, O. & Wolf, M. A well-conditioned estimator for large-dimensional covariance matri-  
347 ces. *Journal of multivariate analysis* **88**, 365–411 (2004).
- 348 30. Schäfer, J. & Strimmer, K. A shrinkage approach to large-scale covariance matrix estimation  
349 and implications for functional genomics. *Statistical applications in genetics and molecular*  
350 *biology* **4** (2005).

351 **Acknowledgements** This work was funded by NIH grants R01GM123489 (S.S., H.K.) R01AI121144,  
352 and P30DA044223 (S.S.); Department of Energy award DESC0014156, IOS0922457 and IOS1444533  
353 (T.E.J.); NSF Awards DEB1022196 and DEB1556262 (J.K.M.). The work conducted by J.L. was funded by

354 the US Department of Energy Joint Genome Institute, which is supported by the Office of Science of the US  
355 Department of Energy under Contract No DE-AC02-05CH11231. We thank Jon Ågren and Grey Monroe  
356 for providing climate data from the *Arabidopsis thaliana* reciprocal transplant experiments; K. Broman and  
357 B. Payseur for the Gough Island mouse data.

358 **Competing Financial Interests** The authors declare that they have no competing financial interests.

359 **Author Contributions** S.S. conceived the idea; H.K. and S.S. designed the study. H.K. wrote the first  
360 draft of the paper, implemented the algorithms and analyzed the data. G.F. contributed to developing the  
361 software, J.K.M., T.E.J. and J.L. contributed data and interpreted the results, and all authors revised the  
362 manuscript.

363 **1 Supplementary Figures**

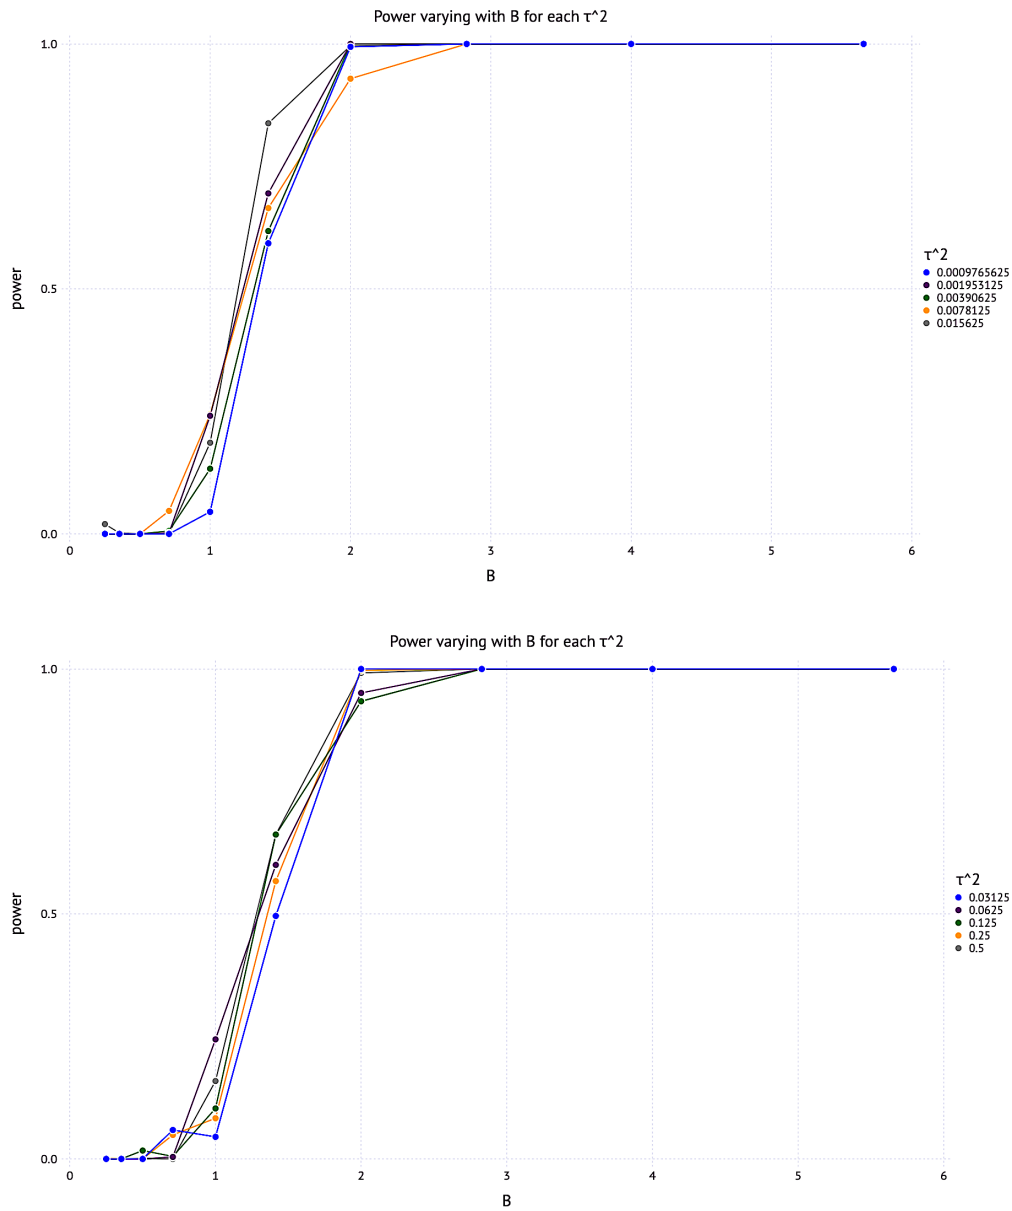

Figure 3: Power varied by  $\tau^2$  on the simulated data from *Arabidopsis thaliana*. The climatic relatedness matrix ( $K_C$ ) as a trait kernel was computed by 3 year by 2 site soil range temperature data. True effect size matrices  $B$ 's varied by the following formula:  $(\sqrt{2})^{j-1}B_0$  ( $j = 1 \dots 10$ ) for  $B_0=[0.25 \ -0.25; 0.25 \ 0.25]$ , randomly selected from  $\{\pm 0.25\}$ .

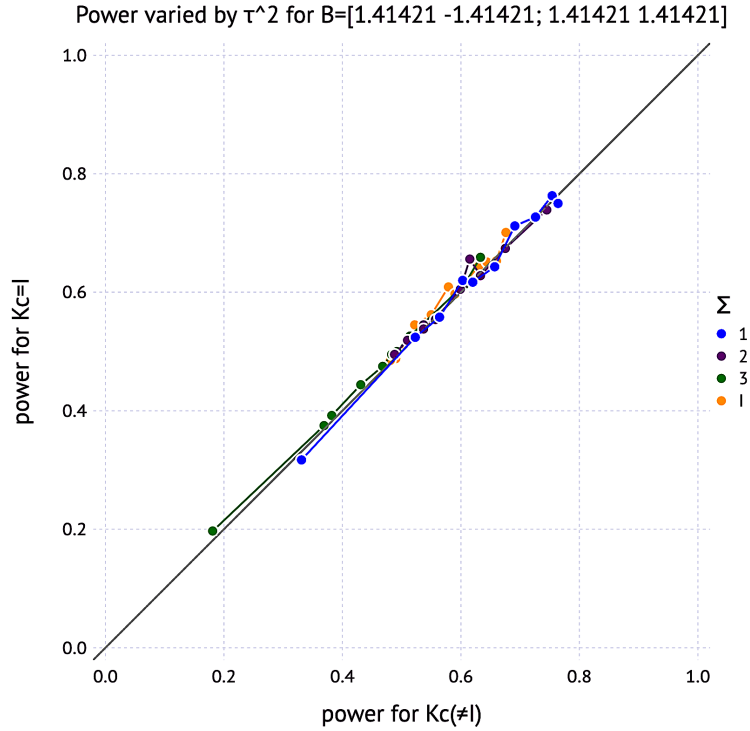

Figure 4: Power comparison of a non-identity  $K_C$  and an identity  $K_C(= I)$  on the simulated data from *Arabidopsis thaliana* depending on unstructured environment errors ( $\Sigma$ ).  $K_C$  was computed by 3 year by 2 site soil daily range temperature data.  $6 \times 6$  matrices of  $\Sigma_i$  for  $i = 1, 2, 3$  are selected using following  $3 \times 3$  sub-matrices:  $A$ ,  $C$  (1's on the diagonal,  $a$ ,  $c$  on off-diagonal entries, respectively),  $B$  ( $b$  in all entries).  $\Sigma_1 = [A \ B; B \ A]$ , where  $a = 0.4$ ,  $b = 0.07$ ,  $\Sigma_2 = [A \ B; B \ A]$ , where  $a = 0.3$ ,  $b = 0.07$ ,  $\Sigma_3 = [A \ B; B \ C]$ , where  $a = 0.3$ ,  $b = 0.0$ ,  $c = 0.1$ .  $I$  is an identity matrix. The result shows subtle differences in power depending on  $\Sigma$ 's



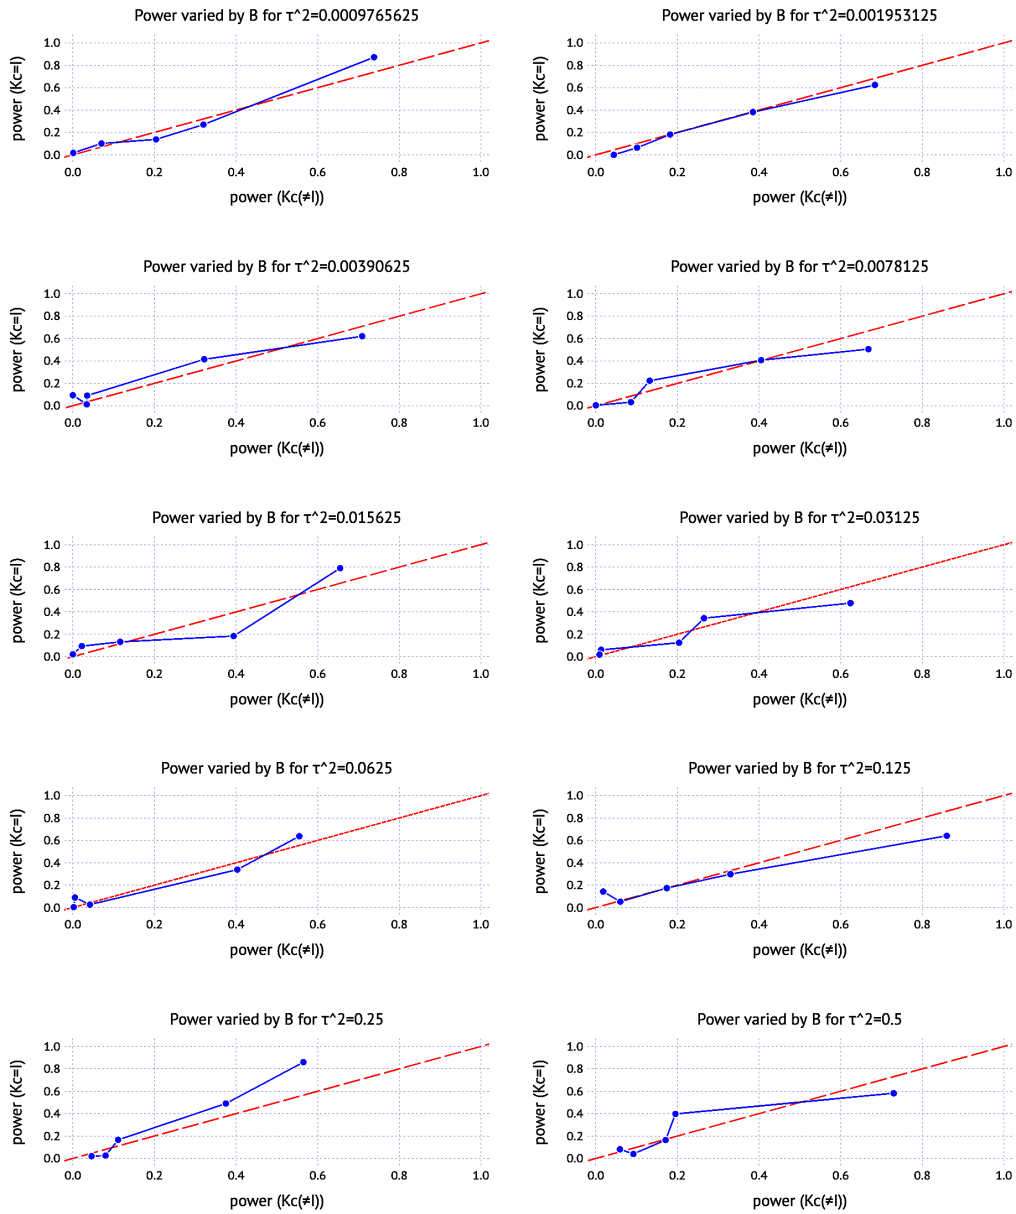

Figure 5: Comparison of power between a non-identity  $K_C(\neq I)$  and an identity  $K_C(= I)$  on the simulated data from *Arabidopsis thaliana*. The non-identity  $K_C$  was computed by 3 year by 2 site soil daily range temperature data.

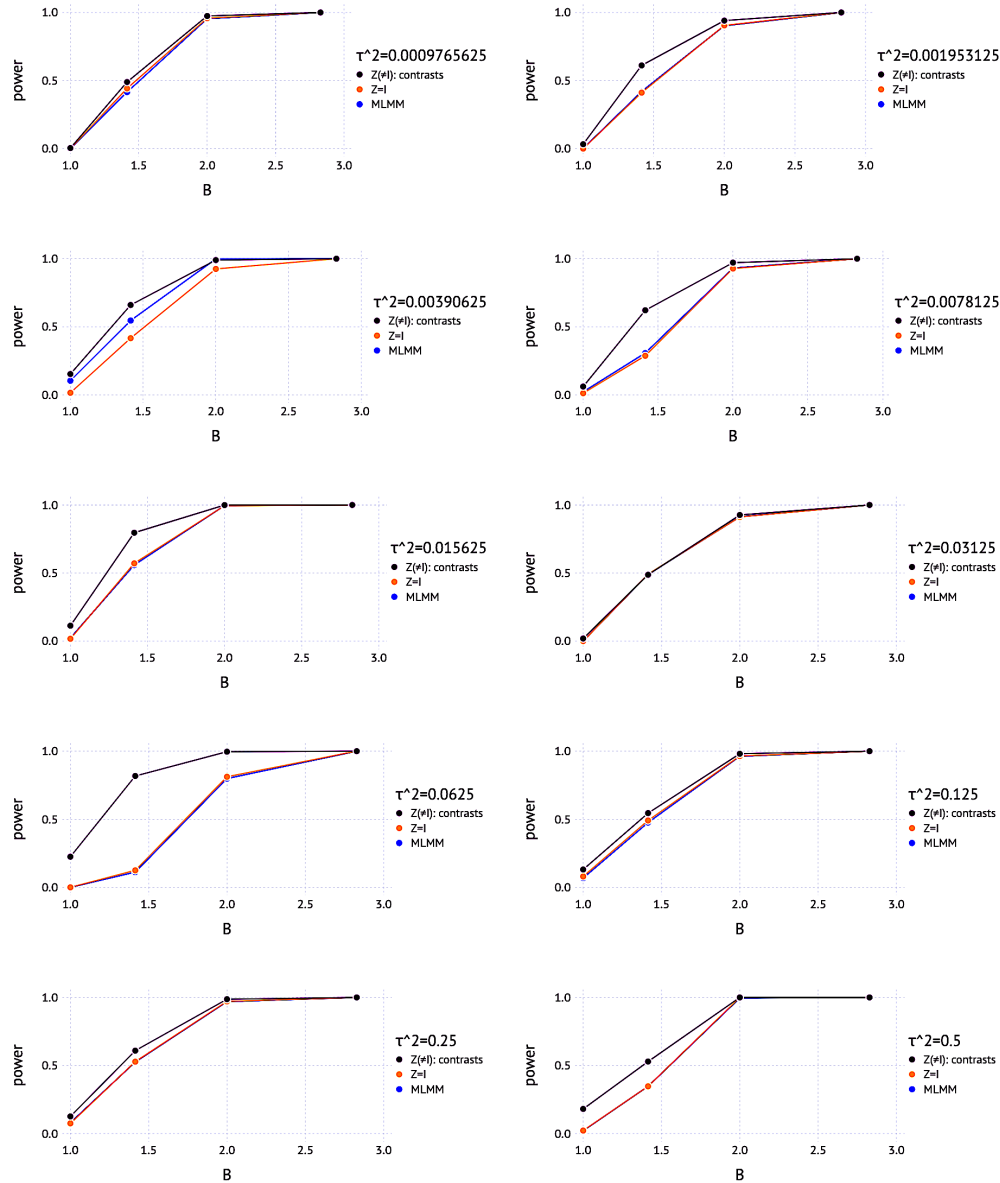

Figure 6: Contribution of trait covariates ( $Z$ ) to power on the simulated data from the Arabidopsis thaliana.  $K_C$  was computed by 3 year by 2 site soil daily range temperature data. 1.  $Z(\neq I)$ : a  $6 \times 2$  matrix of contrasts including the intercept and the site contrast of  $-1$ 's and  $1$ 's for Italy and Sweden, respectively. 2.  $Z = I$ : a  $6 \times 6$  identity matrix. Both were run in FlxQTL. 3. MLMM: the julia-version MLMM as an alternative for GEMMA.

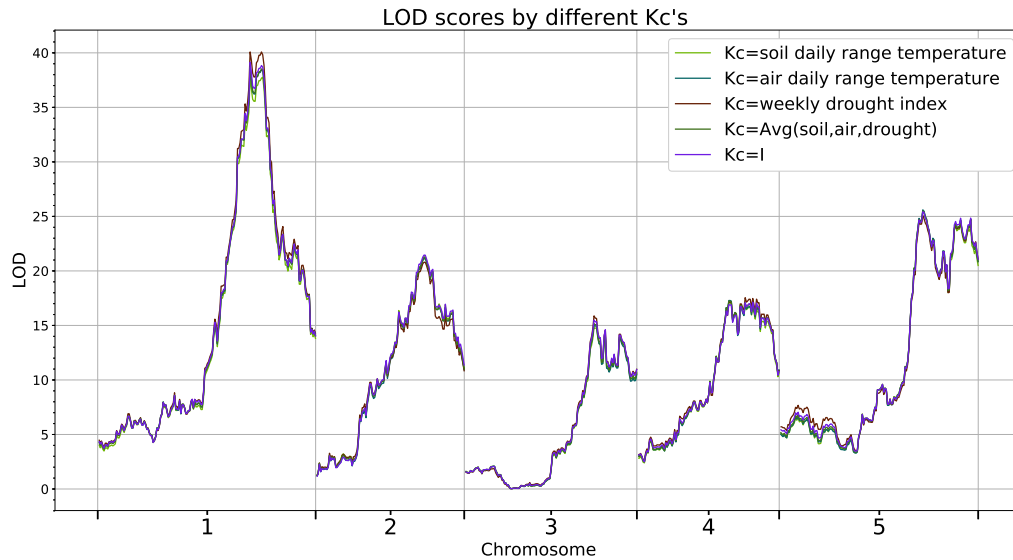

Figure 7: Multivariate genome scan for *Arabidopsis thaliana*: Comparison of LOD scores depending on various climatic relatedness matrices ( $K_C$ ). The trait was fitness (mean number of fruits per seedling planted) considered as 6 sites (a 3 year by 2 site combination).  $K_C$ 's were respectively generated by using soil/air daily range temperatures, weekly drought indices in two sites (Sweden and Italy) for 3 years. The trait covariates ( $Z$ ) were contrasts containing 1's for overall mean for 6 sites and -1's (Italy), 1's (Sweden) for mean difference between sites to measure GxE interactions. The result appears to be insensitive to the choice of  $K_C$ 's.

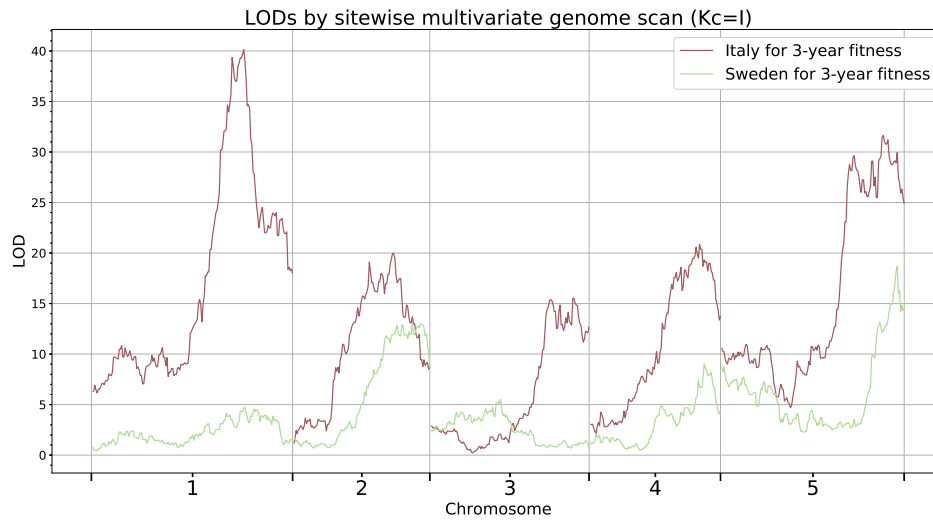

Figure 8: Site-wise multivariate genome scan for *Arabidopsis thaliana*: Comparison of LOD scores for Italy and Sweden, where  $K_C = I$  due to the result in Supplementary Figure 7.

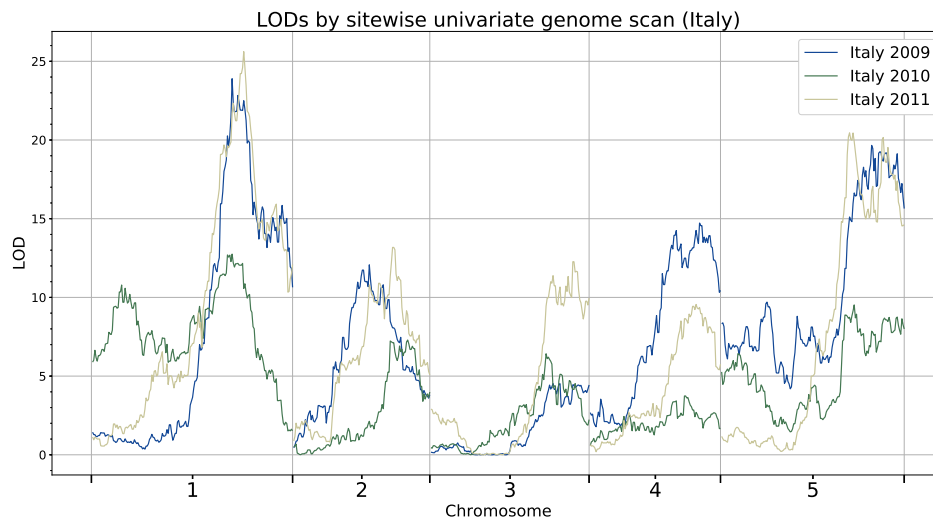

Figure 9: Univariate genome scan for *Arabidopsis thaliana* in Italy from 2009 to 2011.

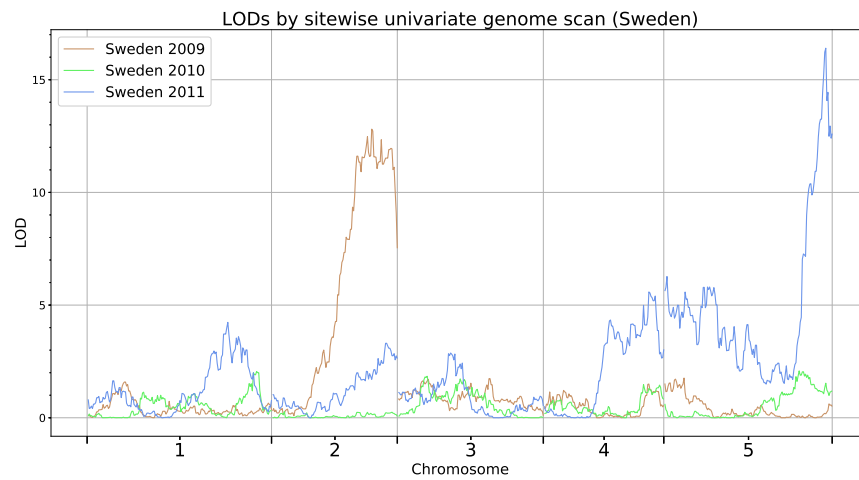

Figure 10: Univariate genome scan for *Arabidopsis thaliana* in Sweden from 2009 to 2011.

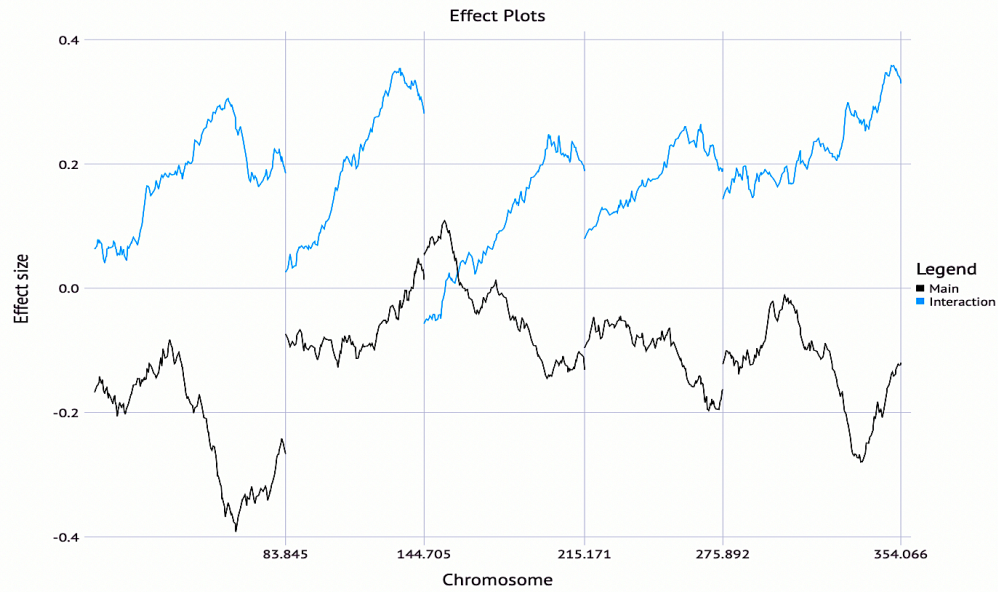

Figure 11: Effect plots for *Arabidopsis thaliana* with  $K_C = I$  for 6 quantitative traits as described in Supplementary Figure 7. Negative values in most main effects imply that the Swedish allele, on average, underperforms. Positive values in most interaction effects indicates home allele advantage; that is, the Swedish genotype in Sweden performs better than that in Italy.

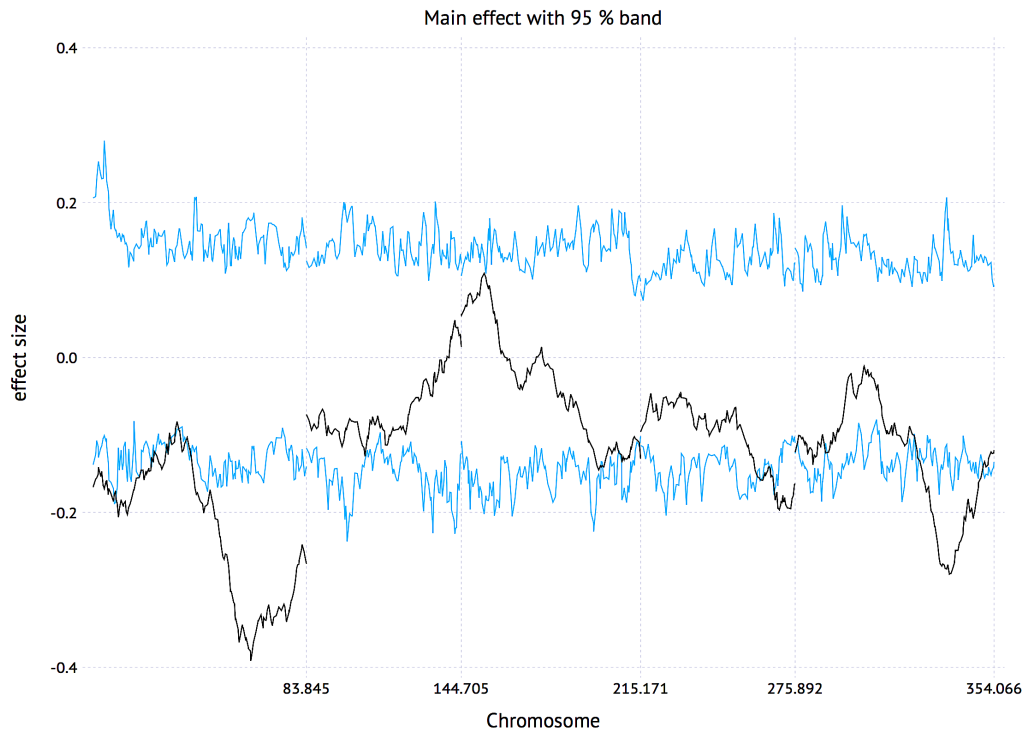

Figure 12: Main effects with 95% band for *Arabidopsis thaliana*. The band was obtained by 100 permutations

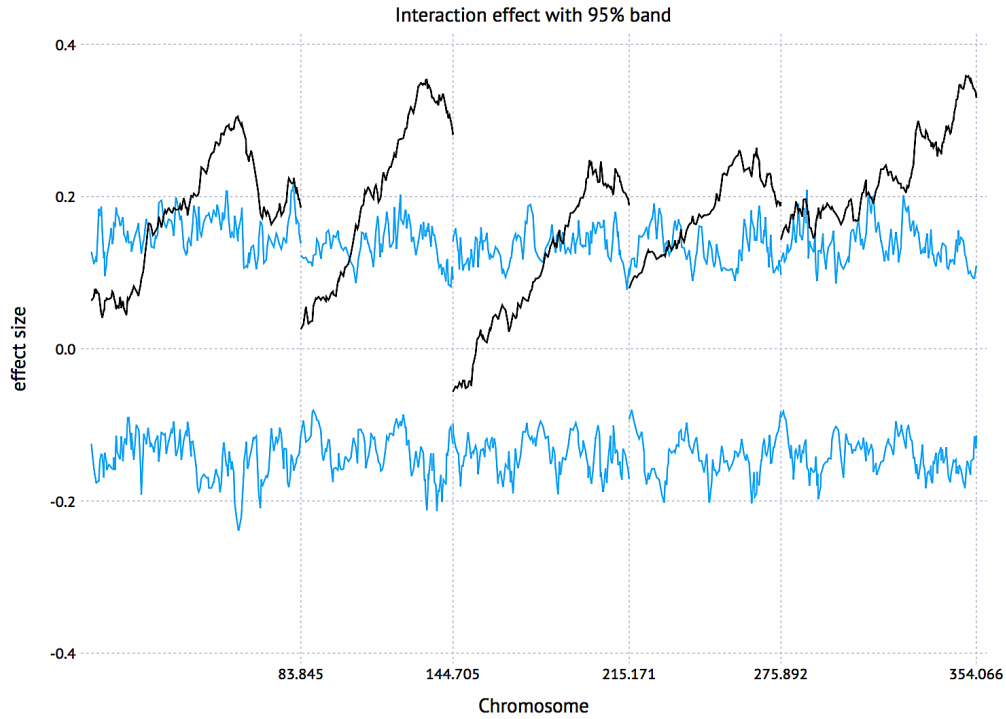

Figure 13: Interaction effects with 95% band for *Arabidopsis thaliana*. The band was obtained by 100 permutations

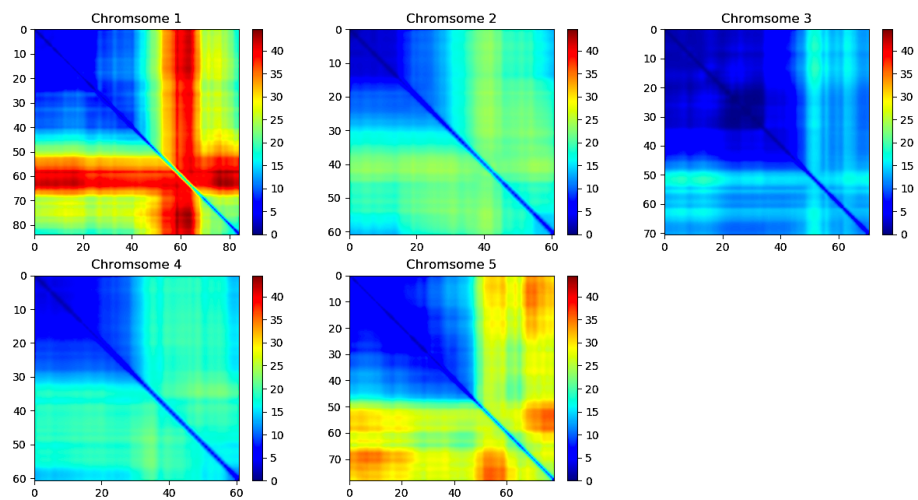

Figure 14: 2-dimensional (2D) multivariate genome scan for *Arabidopsis thaliana*.



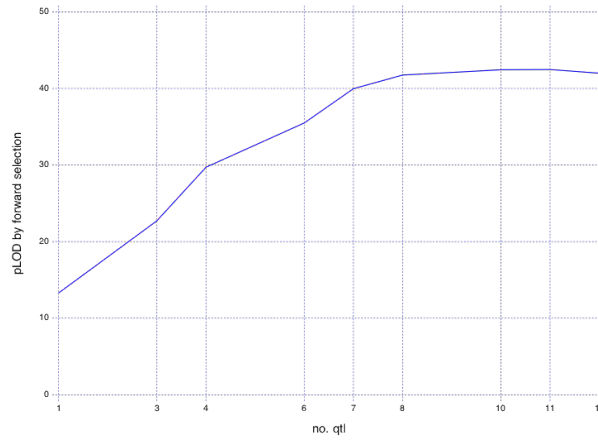

(a) Forward selection

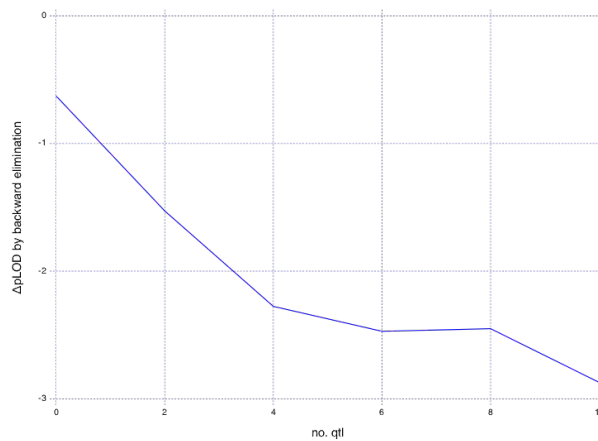

(b) Backward elimination

Figure 15: QTL selection for *Arabidopsis thaliana* (multiple QTL analysis). A model selection approach by forward selection and backward elimination was performed to finalize significant QTL from candidate QTL selected in Supplementary Figure 7, 14. A selection criterion is the penalized LOD score for additive models equivalent to BIC<sup>27</sup>.

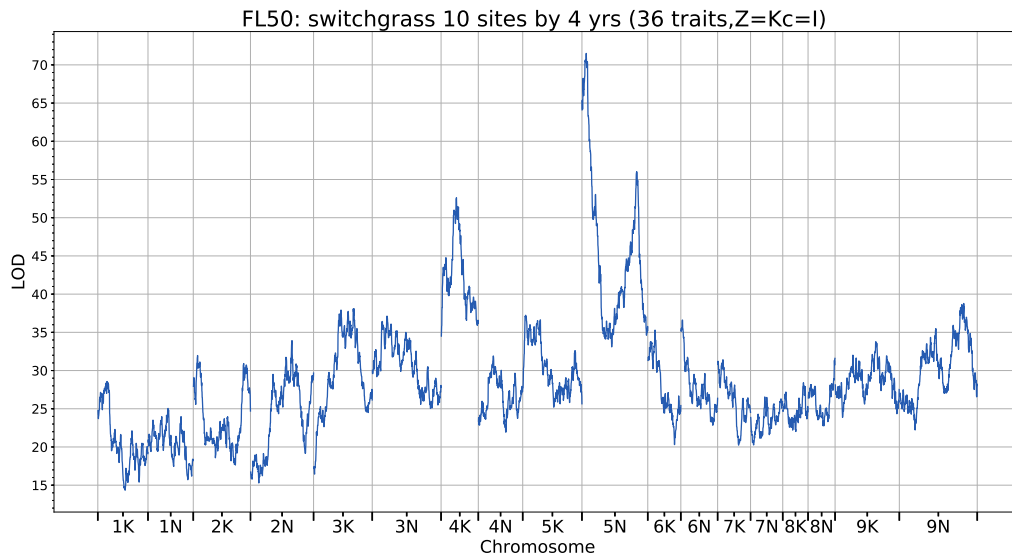

(a) 1-dimensional (1D) genome scan

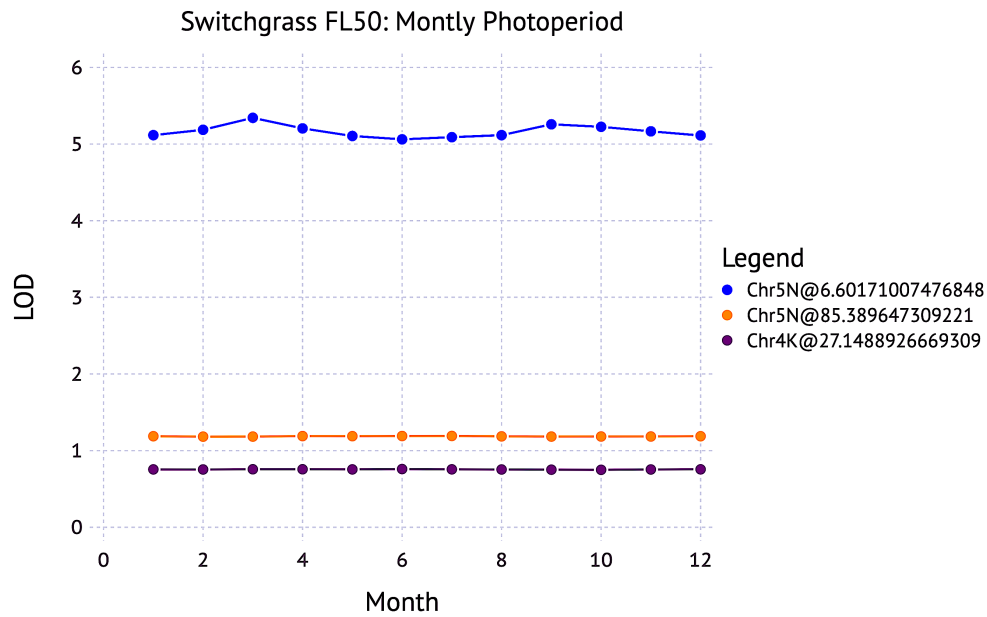

(b) Environment scan by photoperiod

Figure 16: Switchgrass FL50. The environment scan (b) was done for the top 3 QTL selected from the genome scan (a)

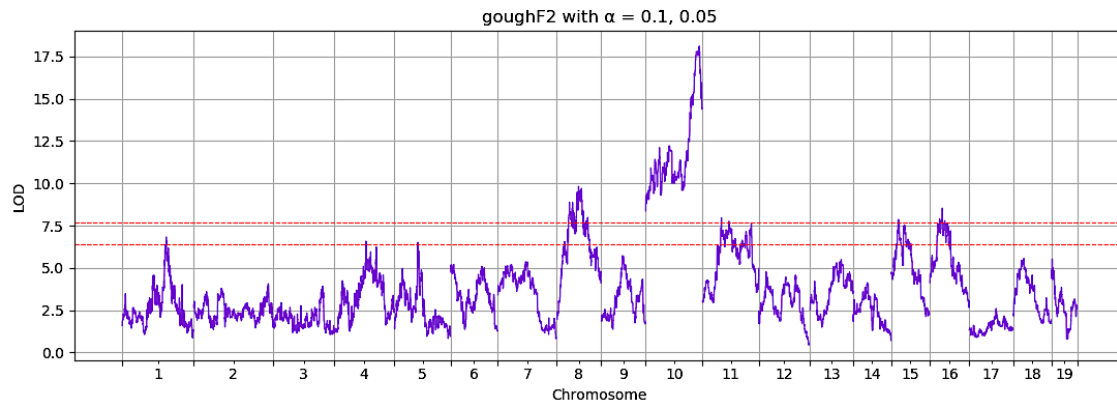

Figure 17: Application to the longitudinal trait data (F2 intercrosses between Gough Island mice and WSB/EiJ): LOD scores and thresholds at  $\alpha = 0.1, 0.05$

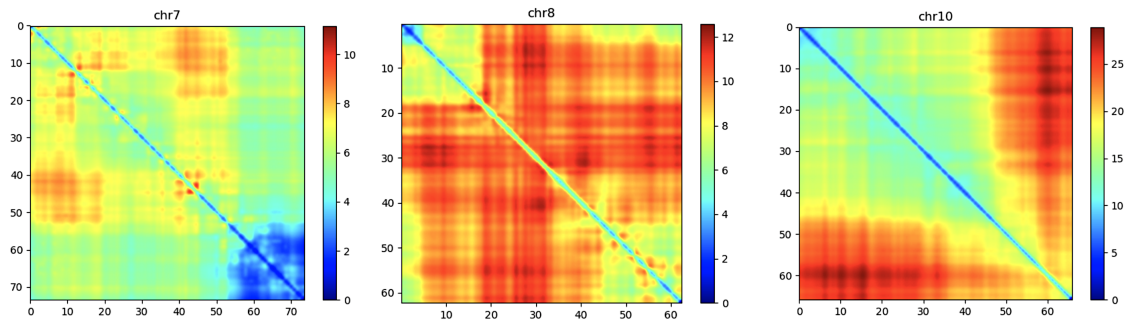

Figure 18: Application to the longitudinal trait data (F2 intercrosses between Gough Island mice and WSB/EiJ): LOD scores by 2D genome scan

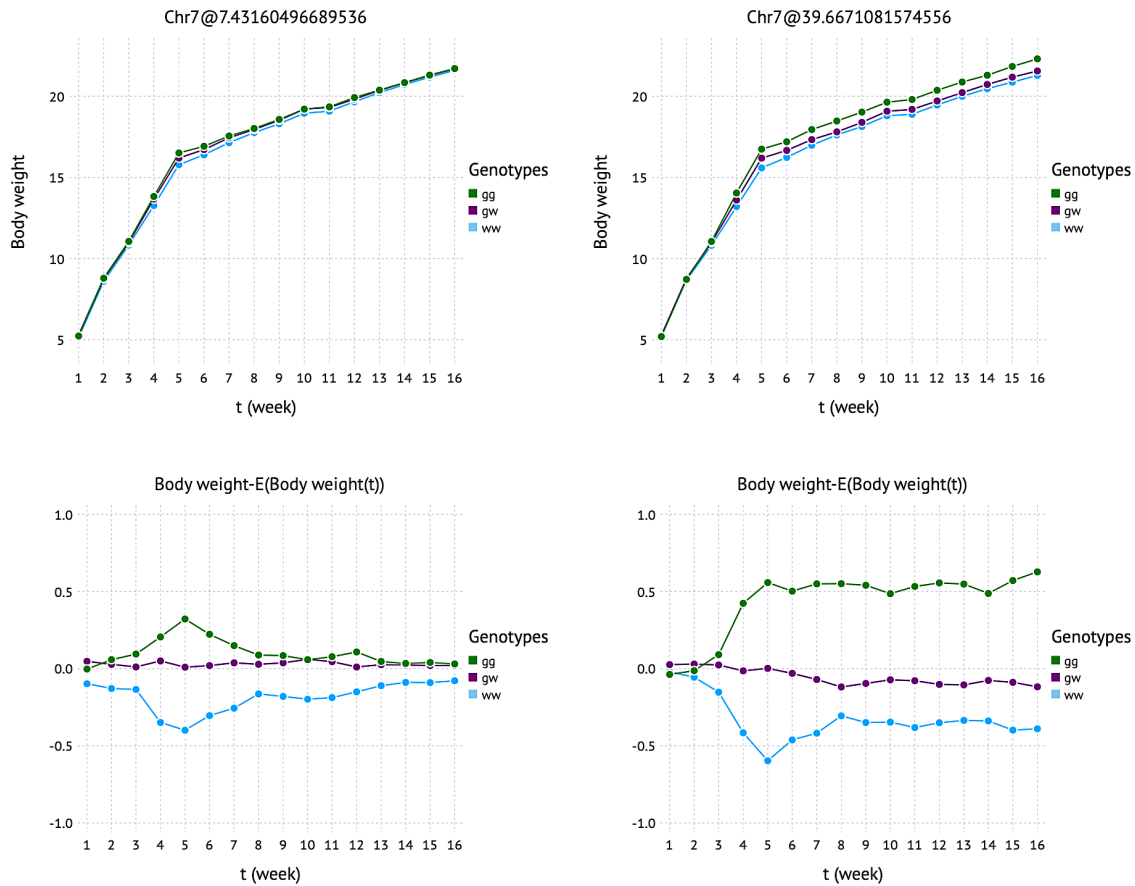

Figure 19: Application to the longitudinal trait data (F2 intercrosses between Gough Island mice and WSB/EiJ): Body weight effects by genotypes and corresponding deviations from weekly overall mean in Chromosome 7.

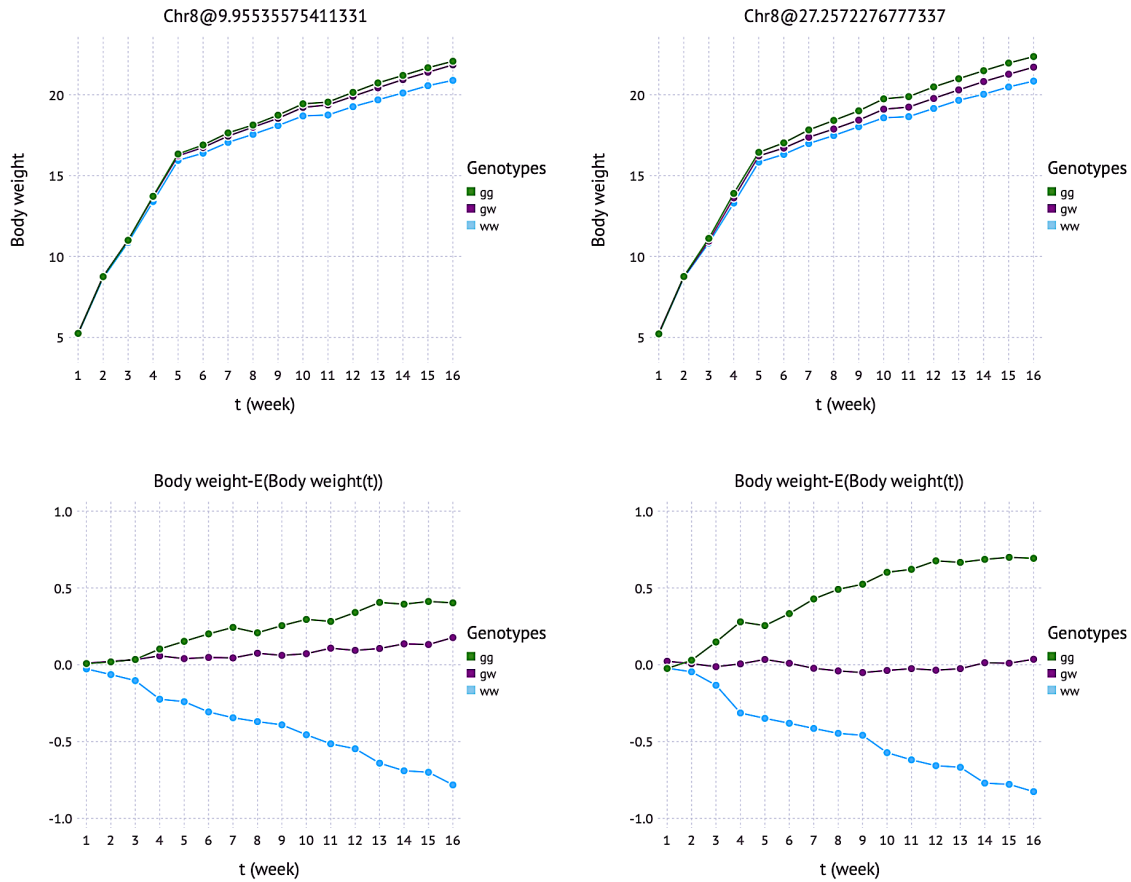

Figure 20: Application to the longitudinal trait data (F2 intercrosses between Gough Island mice and WSB/EiJ): Body weight effects by genotypes and corresponding deviations from weekly overall mean in Chromosome 8.

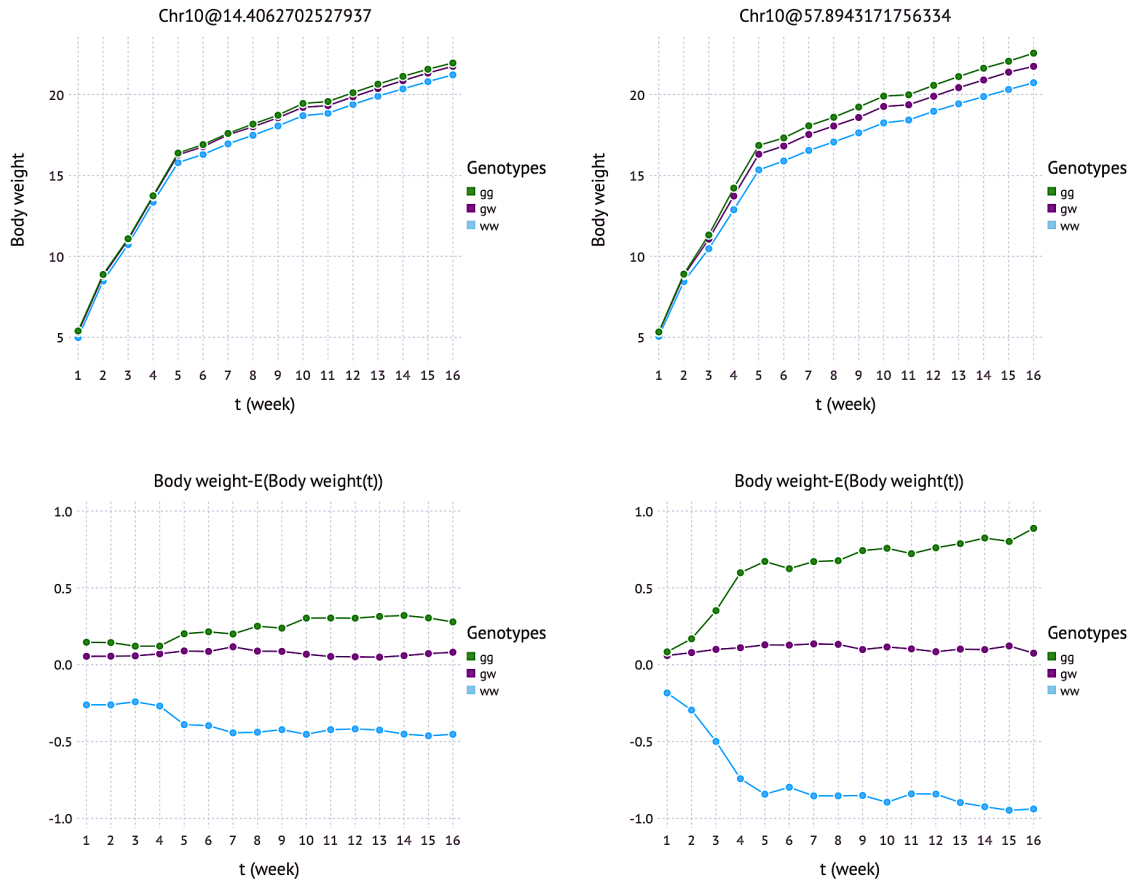

Figure 21: Application to the longitudinal trait data (F2 intercrosses between Gough Island mice and WSB/EiJ): Body weight effects by genotypes and corresponding deviations from weekly overall mean in Chromosome 10.

364 **2 Supplementary Tables**

| Adding 1 or 2 QTL | $\Delta$ pLOD | pLOD   | Deleting 1 or 2 QTL | $\Delta$ pLOD |
|-------------------|---------------|--------|---------------------|---------------|
| 10                | 0.692         | 42.442 | 10                  | -2.872        |
| 11                | 0.028         | 42.471 | 8                   | -2.451        |
| 12                | -0.480        | 41.991 | 6                   | -2.471        |

Table 1: QTL selection for *Arabidopsis thaliana* (multiple QTL analysis) as in Supplementary Figure 15. 11 significant QTL were finalized since the largest decrease ( $\Delta$  pLOD = -2.872) in the backward elimination step when dropping one QTL from 11 QTL in the forward selection step occurred.

| Chromosome | no. of QTL | position (cM) |
|------------|------------|---------------|
| 1          | 2          | 57, 77        |
| 2          | 2          | 133, 140      |
| 3          | 2          | 152, 199      |
| 4          | 2          | 259, 272      |
| 5          | 3          | 280,333,353   |

Table 2: Significant QTL for *Arabidopsis thaliana* as described in Supplementary Figure 15 and Supplementary Table 1.



### 365 **3 Supplementary Note: Multivariate Linear Mixed Model for FlxQTL**

366 The *Flexible* multivariate linear mixed model for *QTL* mapping (FlxQTL) extended from a stan-  
367 dard multivariate linear mixed model (MLMM) <sup>28</sup> is defined as

$$Y_0 = X_0 B Z_0' + R_0 + E_0, \quad (5)$$

368 or its vectorized form,

$$Y_0^v = (Z_0 \otimes X_0) B^v + R_0^v + E_0^v,$$

369 where

$$R_0^v \sim MVN(0, \tau^2 K_C \otimes K_G), \quad E_0^v \sim MVN(0, \Sigma_0 \otimes I_n). \quad (6)$$

370  $Y_0$  is a  $n \times m$  matrix of multivariate responses (multiple traits or a trait in multiple environments),  
371 where  $n$  is the number of individuals (lines),  $m$  is the number of environments (or time points).  
372  $X_0$  is a  $n \times p$  matrix of genotypes including the intercept (or genotype probabilities) for a marker  
373 to be tested and optionally contains individual level covariates such as sex and age.  $Z_0$  is a  $m \times q$   
374 matrix of  $q$  trait covariates such as (site) contrasts, (orthonormal) basis functions and so on.  $B_{p \times q}$  is  
375 then fixed effects to be estimated.  $R_0$  is a matrix of genetic random effects, and  $E_0$  is a matrix of  
376 residual errors.  $K_G$  is a  $n \times n$  genetic relatedness (kinship) matrix, and  $K_C$  is a  $m \times m$  trait kernel  
377 computed by information associated with the traits. In multi-environment trials (MET), the trait  
378 kernel can be a climatic relatedness matrix using high-dimensional environment information such  
379 as daily minimum or maximum temperature, precipitation, etc.  $\tau^2$  is a scalar by parameterizing a  
380  $m \times m$  covariance matrix proportional to  $K_C$  for dimension reduction. Note that we confine  $K_C$

381 and  $K_G$  to full-rank and symmetric positive definite matrices. If they are semi-positive definite,  
 382 one can take advantage of a Shrinkage approach <sup>29,30</sup> to force it to be positive definite. The eigen-  
 383 decomposition to the matrices yields  $K_G = U_G \Lambda_G U_G'$  and  $K_C = U_C \Lambda_C U_C'$ . Multiplying  $U_C' \otimes U_G'$   
 384 to the model gives

$$Y = XBZ' + R + E, \quad (7)$$

$$R^v \sim MVN(0, \tau^2 \Lambda_C \otimes \Lambda_G), \quad E^v \sim MVN(0, \Sigma \otimes I_n), \quad (8)$$

385 where  $Y_{n \times m} = [\mathbf{y}'_1, \mathbf{y}'_2, \dots, \mathbf{y}'_n]'$ ,  $X_{n \times p} = [\mathbf{x}'_1, \mathbf{x}'_2, \dots, \mathbf{x}'_n]'$ ,  $R_{n \times m} = [\mathbf{r}'_1, \mathbf{r}'_2, \dots, \mathbf{r}'_n]'$ , and  $E_{n \times m} =$   
 386  $[\mathbf{e}'_1, \mathbf{e}'_2, \dots, \mathbf{e}'_n]'$ .

387 Or, this is simplified as a vectored form,

$$\mathbf{y}_i = ZB'\mathbf{x}_i + \mathbf{r}_i + \mathbf{e}_i, \quad \mathbf{r}_i \sim N(0, \tau^2 \lambda_i \Lambda_C), \quad \mathbf{e}_i \sim N(0, \Sigma), \quad (9)$$

388 and the variance is  $V_i = \tau^2 \lambda_i \Lambda_C + \Sigma$  ( $i = 1, \dots, n$ ).

389 **Verification of multivariate random interactions** Assume that a multivariate random interaction  
 390 term has a form of  $R_0 = GB_{rand}C'$ , where  $C_{m \times q_1}$  is  $q_1$  background (or high-dimensional) trait (or  
 391 environment) information,  $G_{n \times p_1}$  is  $p_1$  background genetic markers such as genotypes and geno-  
 392 type probabilities, and  $B_{rand}^v \sim MVN(0, \tau^2 I_{q_1} \otimes I_{p_1})$ . Then, the distribution of the multivariate  
 393 random interactions in (6) is obtained as follows.

$$\begin{aligned} E(R_0^v R_0^{v'}) &= E((C \otimes G) B_{rand}^v B_{rand}^{v'} (C' \otimes G')) \\ &= (C \otimes G) E(B_{rand}^v B_{rand}^{v'}) (C' \otimes G') \\ &= (C \otimes G) (\tau^2 I_{q_1} \otimes I_{p_1}) (C' \otimes G') \end{aligned}$$

$$\begin{aligned}
 &= \tau^2(CC' \otimes GG') \\
 &= \tau^2 K_C \otimes K_G,
 \end{aligned}$$

394 where  $C$  and  $G$  are scaled by  $\sqrt{m}$ ,  $\sqrt{n}$ , respectively.

#### 395 **4 Supplementary Note: Expectation Conditional Maximization (ECM)**

396 Since  $R$  is unobservable, the joint log-likelihood function for the ECM<sup>14,21</sup> is written as follows.

$$\begin{aligned}
 &l(Y, R|B, \tau^2, \Sigma) \\
 &= \sum_{i=1}^n \left\{ -m \log(2\pi) - \frac{m}{2} \log \tau^2 - \frac{m}{2} \log(\lambda_i) - \frac{1}{2} \log |\Lambda_C| - \frac{1}{2} \log |\Sigma| \right. \\
 &\quad \left. - \frac{1}{2} \mathbf{e}_i' \Sigma^{-1} \mathbf{e}_i - \frac{1}{2} \mathbf{r}_i' (\tau^2 \lambda_i \Lambda_C)^{-1} \mathbf{r}_i \right\}.
 \end{aligned} \tag{10}$$

397 In the expectation step, the conditional distribution of  $\mathbf{r}_i$  given  $\mathbf{y}_i$  ( $i = 1, \dots, n$ ),  $B^{(t)}$ ,  $\tau^{2(t)}$ , and

398  $\Sigma^{(t)}$  at the current iteration  $t$  is<sup>28</sup>

$$\mathbf{r}_i | \mathbf{y}_i, B^{(t)}, \tau^{2(t)}, \Sigma^{(t)} \sim MVN(\hat{\mathbf{r}}_i^{(t)}, \hat{\Theta}_i^{(t)}), \tag{11}$$

399 where

$$\begin{aligned}
 V_i^{(t)} &= \tau^{2(t)} \lambda_i \Lambda_C + \Sigma^{(t)}, \quad \hat{\mathbf{r}}_i = \tau^{2(t)} \lambda_i \Lambda_C (V_i^{(t)})^{-1} (\mathbf{y}_i - ZB^{(t)'} \mathbf{x}_i), \\
 \hat{\Theta}_i^{(t)} &= \tau^{2(t)} \lambda_i \Lambda_C - \tau^{2(t)} \lambda_i \Lambda_C (V_i^{(t)})^{-1} \tau^{2(t)} \lambda_i \Lambda_C.
 \end{aligned} \tag{12}$$

400 The expectation of the loglikelihood function in terms of  $R$  given  $Y$ ,  $B^{(t)}$ ,  $\tau^{2(t)}$ , and  $\Sigma^{(t)}$  is obtained

401 as follows.

$$E(l(Y, R|B, \tau^2, \Sigma) | R|Y, B^{(t)}, \tau^{2(t)}, \Sigma^{(t)})$$

$$\begin{aligned}
&= \sum_{i=1}^n \left\{ -m \log(2\pi) - \frac{m}{2} \log \tau^2 - \frac{m}{2} \log(\lambda_i) - \frac{1}{2} \log |\Lambda_C| - \frac{1}{2} \log |\Sigma| \right. \\
&\quad - \frac{1}{2} (\mathbf{y}_i - ZB'\mathbf{x}_i)' \Sigma^{-1} (\mathbf{y}_i - ZB'\mathbf{x}_i) - \frac{1}{2} \hat{\mathbf{r}}_i^{(t)'} (\tau^{-2} \lambda_i^{-1} \Lambda_C^{-1} + \Sigma^{-1}) \hat{\mathbf{r}}_i^{(t)} \\
&\quad \left. + \hat{\mathbf{r}}_i^{(t)'} \Sigma^{-1} (\mathbf{y}_i - ZB'\mathbf{x}_i) - \frac{1}{2} \text{tr}((\tau^{-2} \lambda_i^{-1} \Lambda_C^{-1} + \Sigma^{-1}) \hat{\Theta}_i^{(t)}) \right\}. \tag{13}
\end{aligned}$$

402 In the conditional maximization step, one can update  $B^{(t+1)}$  conditional on  $\tau^{2(t)}$  and  $\Sigma^{(t)}$ , followed  
403 by updating  $\{\tau^{2(t+1)}, \Sigma^{(t+1)}\}$  conditional on  $B^{(t+1)}$ ,  $\tau^{2(t)}$ , and  $\Sigma^{(t)}$  <sup>14</sup>.

$$B^{(t+1)} = (X'X)^{-1} X'(Y - \hat{R}^{(t)}) \Sigma^{-1} Z(Z'\Sigma^{-1}Z)^{-1}, \tag{14}$$

$$\tau^{2(t+1)} = \frac{1}{nm} \sum_{i=1}^n \text{tr}(\lambda_i^{-1} \Lambda_C^{-1} (\hat{\mathbf{r}}_i^{(t)} \hat{\mathbf{r}}_i^{(t)'} + \hat{\Theta}_i^{(t)})), \tag{15}$$

$$\Sigma^{(t+1)} = \frac{1}{n} \sum_{i=1}^n (\hat{\mathbf{e}}_i^{(t)} \hat{\mathbf{e}}_i^{(t)'} + \hat{\Theta}_i^{(t)}), \tag{16}$$

$$\text{where } \hat{\mathbf{e}}_i^{(t)} = \mathbf{y}_i - ZB^{(t+1)'} \mathbf{x}_i - \hat{\mathbf{r}}_i^{(t)}. \tag{17}$$

404 **Log-likelihood function** The joint log-likelihood function for the ECM is simplified in the fol-  
405 lowing way.

$$\begin{aligned}
&l(Y, R|B, \tau^2, \Sigma) = -nm \log(2\pi) \\
&\quad - \frac{1}{2} \log |(U_C \otimes U_G)(\tau^2 \Lambda_C \otimes \Lambda_G)(U_C' \otimes U_G')| - \frac{1}{2} \log |(U_C \otimes U_G)(\Sigma \otimes I_n)(U_C' \otimes U_G')| \\
&\quad - \frac{1}{2} (Y_0 - X_0 B Z_0' - R_0)^{v'} ((U_C \otimes U_G)(\Sigma \otimes I_n)(U_C' \otimes U_G'))^{-1} (Y_0 - X_0 B Z_0' - R_0)^v \\
&\quad - \frac{1}{2} R_0^{v'} ((U_C \otimes U_G)(\tau^2 \Lambda_C \otimes \Lambda_G)(U_C' \otimes U_G'))^{-1} R_0^v \\
&= -nm \log(2\pi) - \frac{nm}{2} \log(\tau^2) - \frac{m}{2} \log |\Lambda_G| - \frac{n}{2} \log |\Lambda_C| - \frac{1}{2} \log |\Sigma \otimes I_n| \\
&\quad + 2 \log |(U_C' \otimes U_G')| - \frac{1}{2} (Y - X B Z' - R)^{v'} (\Sigma \otimes I_n)^{-1} (Y - X B Z' - R)^v \\
&\quad - \frac{1}{2} R^{v'} (\tau^2 \Lambda_C \otimes \Lambda_G)^{-1} R^v
\end{aligned}$$

$$\begin{aligned}
 &= \sum_{i=1}^n \left\{ -m \log(2\pi) - \frac{m}{2} \log \tau^2 - \frac{m}{2} \log(\lambda_i) - \frac{1}{2} \log |\Lambda_C| - \frac{1}{2} \log |\Sigma| \right. \\
 &\quad \left. - \frac{1}{2} \mathbf{e}_i' \Sigma^{-1} \mathbf{e}_i - \frac{1}{2} \mathbf{r}_i' (\tau^2 \lambda_i \Lambda_C)^{-1} \mathbf{r}_i \right\}. \tag{18}
 \end{aligned}$$

406 **Derivation of conditional expected log-likelihood and the closed form solutions** To obtain the  
 407 closed-form solutions of  $B^{(t+1)}$ ,  $\tau^{2(t+1)}$ , and  $\Sigma^{(t+1)}$  to the conditional expected loglikelihood in  
 408 (13), one differentiates (13) with respect to each parameter after integrating out  $\mathbf{r}_i$  ( $i = 1, \dots, n$ ) in  
 409 the joint log-likelihood function, (10). In (10), taking expectation with respect to  $\mathbf{r}_i$  ( $i = 1, \dots, n$ )  
 410 yields

$$\begin{aligned}
 El &= E(l(Y, R|B, \tau^2, \Sigma)|R|Y, B^{(t)}, \tau^{2(t)}, \Sigma^{(t)}) \\
 &= \sum_{i=1}^n \left\{ -m \log(2\pi) - \frac{m}{2} \log \tau^2 - \frac{m}{2} \log(\lambda_i) - \frac{1}{2} \log |\Lambda_C| - \frac{1}{2} \log |\Sigma| \right. \\
 &\quad \left. - \frac{1}{2} E((\mathbf{y}_i - ZB'\mathbf{x}_i - \mathbf{r}_i)' \Sigma^{-1} (\mathbf{y}_i - ZB'\mathbf{x}_i - \mathbf{r}_i) | R) - \frac{1}{2} E(\mathbf{r}_i' (\tau^2 \lambda_i \Lambda_C)^{-1} \mathbf{r}_i | R) \right\}.
 \end{aligned}$$

411 For simplicity, let  $E(\cdot | R|Y, B^{(t)}, \tau^{2(t)}, \Sigma^{(t)}) = E(\cdot | R)$ . The last two terms then can be simplified  
 412 as follows:

$$\begin{aligned}
 &\sum_{i=1}^n \left\{ E\left(-\frac{1}{2} (\mathbf{y}_i - ZB'\mathbf{x}_i)' \Sigma^{-1} (\mathbf{y}_i - ZB'\mathbf{x}_i) + \mathbf{r}_i' \Sigma^{-1} (\mathbf{y}_i - ZB'\mathbf{x}_i) \right. \right. \\
 &\quad \left. \left. - \frac{1}{2} \mathbf{r}_i' \Sigma^{-1} \mathbf{r}_i - \frac{1}{2} \mathbf{r}_i' (\tau^2 \lambda_i \Lambda_C)^{-1} \mathbf{r}_i | R \right\} \\
 &= \sum_{i=1}^n \left\{ -\frac{1}{2} (\mathbf{y}_i - ZB'\mathbf{x}_i)' \Sigma^{-1} (\mathbf{y}_i - ZB'\mathbf{x}_i) + E(\mathbf{r}_i' | R) \Sigma^{-1} (\mathbf{y}_i - ZB'\mathbf{x}_i) \right. \\
 &\quad \left. - \frac{1}{2} E(\mathbf{r}_i' (\Sigma^{-1} + (\tau^2 \lambda_i \Lambda_C)^{-1}) \mathbf{r}_i | R) \right\} \\
 &= \sum_{i=1}^n \left\{ -\frac{1}{2} (\mathbf{y}_i - ZB'\mathbf{x}_i)' \Sigma^{-1} (\mathbf{y}_i - ZB'\mathbf{x}_i) + \hat{\mathbf{r}}_i^{(t)'} \Sigma^{-1} (\mathbf{y}_i - ZB'\mathbf{x}_i) \right. \\
 &\quad \left. - \frac{1}{2} \text{tr}((\Sigma^{-1} + (\tau^2 \lambda_i \Lambda_C)^{-1}) E(\mathbf{r}\mathbf{r}' | R)) \right\}.
 \end{aligned}$$

$$\begin{aligned}
 &= \sum_{i=1}^n \left\{ -\frac{1}{2}(\mathbf{y}_i - ZB'\mathbf{x}_i)'\Sigma^{-1}(\mathbf{y}_i - ZB'\mathbf{x}_i) + \hat{\mathbf{r}}_i^{(t)'}\Sigma^{-1}(\mathbf{y}_i - ZB'\mathbf{x}_i) \right. \\
 &\quad \left. - \frac{1}{2}\text{tr}((\Sigma^{-1} + (\tau^2\lambda_i\Lambda_C)^{-1})(\hat{\mathbf{r}}_i^{(t)}\hat{\mathbf{r}}_i^{(t)'} + \hat{\Theta}_i^{(t)})) \right\} \\
 &= \sum_{i=1}^n \left\{ -\frac{1}{2}(\mathbf{y}_i - ZB'\mathbf{x}_i)'\Sigma^{-1}(\mathbf{y}_i - ZB'\mathbf{x}_i) + \hat{\mathbf{r}}_i^{(t)'}\Sigma^{-1}(\mathbf{y}_i - ZB'\mathbf{x}_i) \right. \\
 &\quad \left. - \frac{1}{2}\text{tr}((\Sigma^{-1} + (\tau^2\lambda_i\Lambda_C)^{-1})\hat{\Theta}_i^{(t)}) - \frac{1}{2}\hat{\mathbf{r}}_i^{(t)'}(\Sigma^{-1} + (\tau^2\lambda_i\Lambda_C)^{-1})(\hat{\mathbf{r}}_i^{(t)}) \right\}.
 \end{aligned}$$

413 Now one can find the closed-form solutions of  $B$ ,  $\tau^2$ , and  $\Sigma$  to the expected log-likelihood function  
 414 using properties of the trace, calculus for matrices. For the solution for  $B$ ,

$$\begin{aligned}
 El &= \sum_{i=1}^n \left\{ -\frac{1}{2}(\mathbf{y}_i - ZB'\mathbf{x}_i)'\Sigma^{-1}(\mathbf{y}_i - ZB'\mathbf{x}_i) + \hat{\mathbf{r}}_i^{(t)'}\Sigma^{-1}(\mathbf{y}_i - ZB'\mathbf{x}_i) \right\} + C, \\
 &= \sum_{i=1}^n \left\{ -\frac{1}{2}(\Sigma^{-\frac{1}{2}}\mathbf{y}_i - \Sigma^{-\frac{1}{2}}ZB'\mathbf{x}_i)'(\Sigma^{-\frac{1}{2}}\mathbf{y}_i - \Sigma^{-\frac{1}{2}}ZB'\mathbf{x}_i) \right. \\
 &\quad \left. + (\Sigma^{-\frac{1}{2}}\hat{\mathbf{r}}_i^{(t)})'(\Sigma^{-\frac{1}{2}}\mathbf{y}_i - \Sigma^{-\frac{1}{2}}ZB'\mathbf{x}_i) \right\} + C,
 \end{aligned}$$

415 where  $C$  is a constant.

$$\frac{\partial El}{\partial B^{rv}} = \sum_{i=1}^n ((\mathbf{x}_i' \otimes \Sigma^{-\frac{1}{2}}Z)'(\Sigma^{-\frac{1}{2}}\mathbf{y}_i - (\mathbf{x}_i' \otimes \Sigma^{-\frac{1}{2}}Z)B^{rv}) - (\mathbf{x}_i' \otimes \Sigma^{-\frac{1}{2}}Z)'\Sigma^{-\frac{1}{2}}\hat{\mathbf{r}}_i^{(t)}) = 0$$

416

$$\sum_{i=1}^n (\mathbf{x}_i\mathbf{x}_i' \otimes Z'\Sigma^{-1}Z)B^{rv} = \sum_{i=1}^n (\mathbf{x}_i \otimes Z'\Sigma^{-\frac{1}{2}})(\Sigma^{-\frac{1}{2}}\mathbf{y}_i - \Sigma^{-\frac{1}{2}}\hat{\mathbf{r}}_i^{(t)})$$

$$B^{rv} = ((X'X)^{-1}X' \otimes (Z'\Sigma^{-1}Z)^{-1}Z'\Sigma^{-\frac{1}{2}})(\Sigma^{-\frac{1}{2}}(Y' - \hat{R}^{(t)}))^{rv}$$

$$B' = (Z'\Sigma^{-1}Z)^{-1}Z'\Sigma^{-1}(Y' - \hat{R}^{(t)})X(X'X)^{-1}$$

$$\therefore B = (X'X)^{-1}X'(Y - \hat{R}^{(t)})\Sigma^{-1}Z(Z'\Sigma^{-1}Z)^{-1}$$

417

$$\frac{\partial El}{\partial \tau^2} = \sum_{i=1}^n \left\{ -\frac{m}{2}\tau^{-2} + \frac{1}{2}\hat{\mathbf{r}}_i^{(t)'}(\tau^{-4}\lambda_i^{-1}\Lambda_C^{-1})\hat{\mathbf{r}}_i^{(t)} + \frac{1}{2}\text{tr}(\tau^{-4}\lambda_i^{-1}\Lambda_C^{-1}\hat{\Theta}_i^{(t)}) \right\} = 0 \quad (19)$$

418

$$\begin{aligned}
 mn &= \sum_{i=1}^n \text{tr}((\tau^{-2}\lambda_i^{-1}\Lambda_C^{-1})\hat{\mathbf{r}}_i^{(t)}\hat{\mathbf{r}}_i^{(t)'} + (\tau^{-2}\lambda_i^{-1}\Lambda_C^{-1})\hat{\Theta}_i^{(t)}) \\
 mn\tau^2 &= \text{tr}(\sum_{i=1}^n \lambda_i^{-1}\Lambda_C^{-1}(\hat{\mathbf{r}}_i^{(t)}\hat{\mathbf{r}}_i^{(t)'} + \hat{\Theta}_i^{(t)})) \\
 \therefore \tau^{2(t+1)} &= \frac{1}{nm} \sum_{i=1}^n \text{tr}(\lambda_i^{-1}\Lambda_C^{-1}(\hat{\mathbf{r}}_i^{(t)}\hat{\mathbf{r}}_i^{(t)'} + \hat{\Theta}_i^{(t)}))
 \end{aligned}$$

419

$$\begin{aligned}
 \frac{\partial El}{\partial \Sigma^v} &= \sum_{i=1}^n \left\{ -\frac{1}{2} \text{tr}(\Sigma^{-1} \frac{\partial \Sigma}{\partial \Sigma^v}) + \frac{1}{2} (\mathbf{y}_i - ZB^{(t+1)'} \mathbf{x}_i)' (\Sigma^{-1} \frac{\partial \Sigma}{\partial \Sigma^v} \Sigma^{-1}) (\mathbf{y}_i - ZB^{(t+1)'} \mathbf{x}_i) \right. \\
 &+ \hat{\mathbf{r}}_i^{(t)'} (\Sigma^{-1} \frac{\partial \Sigma}{\partial \Sigma^v} \Sigma^{-1}) \hat{\mathbf{r}}_i^{(t)} + \frac{1}{2} \text{tr}(\Sigma^{-1} \frac{\partial \Sigma}{\partial \Sigma^v} \Sigma^{-1} \hat{\Theta}_i^{(t)}) \\
 &\left. - \hat{\mathbf{r}}_i^{(t)'} (\Sigma^{-1} \frac{\partial \Sigma}{\partial \Sigma^v} \Sigma^{-1}) (\mathbf{y}_i - ZB^{(t+1)'} \mathbf{x}_i) \right\} = 0
 \end{aligned}$$

420

$$\begin{aligned}
 \sum_{i=1}^n \left\{ \text{tr}(-I_m + \Sigma^{-1} (\mathbf{y}_i - ZB^{(t+1)'} \mathbf{x}_i) (\mathbf{y}_i - ZB^{(t+1)'} \mathbf{x}_i)' + \Sigma^{-1} \hat{\mathbf{r}}_i^{(t)} \hat{\mathbf{r}}_i^{(t)'} \right. \\
 \left. + \Sigma^{-1} \hat{\Theta}_i^{(t)} - 2\Sigma^{-1} (\mathbf{y}_i - ZB^{(t+1)'} \mathbf{x}_i) \hat{\mathbf{r}}_i^{(t)'} \right\} = 0
 \end{aligned}$$

421

$$\begin{aligned}
 n \cdot \text{tr}(\Sigma) &= \sum_{i=1}^n \text{tr}(\hat{\mathbf{e}}_i^{(t)} \hat{\mathbf{e}}_i^{(t)'} + \hat{\Theta}_i^{(t)}) \\
 \therefore \Sigma^{(t+1)} &= \frac{1}{n} \sum_{i=1}^n (\hat{\mathbf{e}}_i^{(t)} \hat{\mathbf{e}}_i^{(t)'} + \hat{\Theta}_i^{(t)}),
 \end{aligned}$$

422 where  $\hat{\mathbf{e}}_i^{(t)} = \mathbf{y}_i - ZB^{(t+1)'} \mathbf{x}_i - \hat{\mathbf{r}}_i^{(t)}$ .

## 423 5 Supplementary Note: Nesterov's Accelerated Gradient with Speed Restart

424 **Algorithm** : ECM embedded in the speed restarting Nesterov's scheme <sup>20</sup>

425 **input** :  $B^{(0)} \in \mathbb{R}^{q \times p}$ ,  $\tau^{2(0)} \in \mathbb{R}$ ,  $\Sigma^{(0)} \in \mathbb{R}^{m \times m}$ ,  $B^{(-1)} = B^{(0)}$ ,  $\tau^{2(-1)} = \tau^{2(0)}$ ,  $\Sigma^{(-1)} = \Sigma^{(0)}$ ,

426  $t_{min} \in \mathbb{N}$

427  $j \leftarrow 1$

428 **while**  $t = 1, \| B^{(t)} - B^{(t-1)} \| + \| \tau^{2(t)} - \tau^{2(t-1)} \| + \| \Sigma^{(t)} - \Sigma^{(t-1)} \| > \epsilon$

429 for small enough  $\epsilon$

430 **E-step** : Integrate out the unknown complete data loglikelihood by

431  $\mathbf{r}_i | \mathbf{y}_i, B^{(t-1)}, \tau^{2(t-1)}, \Sigma^{(t-1)} \sim MVN(\hat{\mathbf{r}}_i^{(t-1)}, \hat{\Theta}_i^{(t-1)})$  as in (11).

432 **CM-step** : Update each parameter by maximization over the full parameter space as in (14), (15),

433 and (16).

434 **Nesterov's Acceleration** :

$$\begin{aligned} B^{(t)} &\leftarrow B^{(t)} + \frac{j-1}{j+2}(B^{(t)} - B^{(t-1)}) \\ \tau^{2(t)} &\leftarrow \tau^{2(t)} + \frac{j-1}{j+2}(\tau^{2(t)} - \tau^{2(t-1)}) \\ \Sigma^{(t)} &\leftarrow \Sigma^{(t)} + \frac{j-1}{j+2}(\Sigma^{(t)} - \Sigma^{(t-1)}) \end{aligned}$$

435 **if**  $\| B^{(t)} - B^{(t-1)} \| + \| \tau^{2(t)} - \tau^{2(t-1)} \| + \| \Sigma^{(t)} - \Sigma^{(t-1)} \| < \| B^{(t-1)} - B^{(t-2)} \| + \|$

436  $\tau^{2(t-1)} - \tau^{2(t-2)} \| + \| \Sigma^{(t-1)} - \Sigma^{(t-2)} \|$  &  $t \geq t_{min}$

437 **then**  $j \leftarrow 1$

438 **else**  $j \leftarrow j + 1$

439 **end if**

440 **end while**
